# Supplementary material
Source: MDPI journal article supplement (https://www.mdpi.com/1999-4907/14/1/155)
Supplement: s1 [file s1]

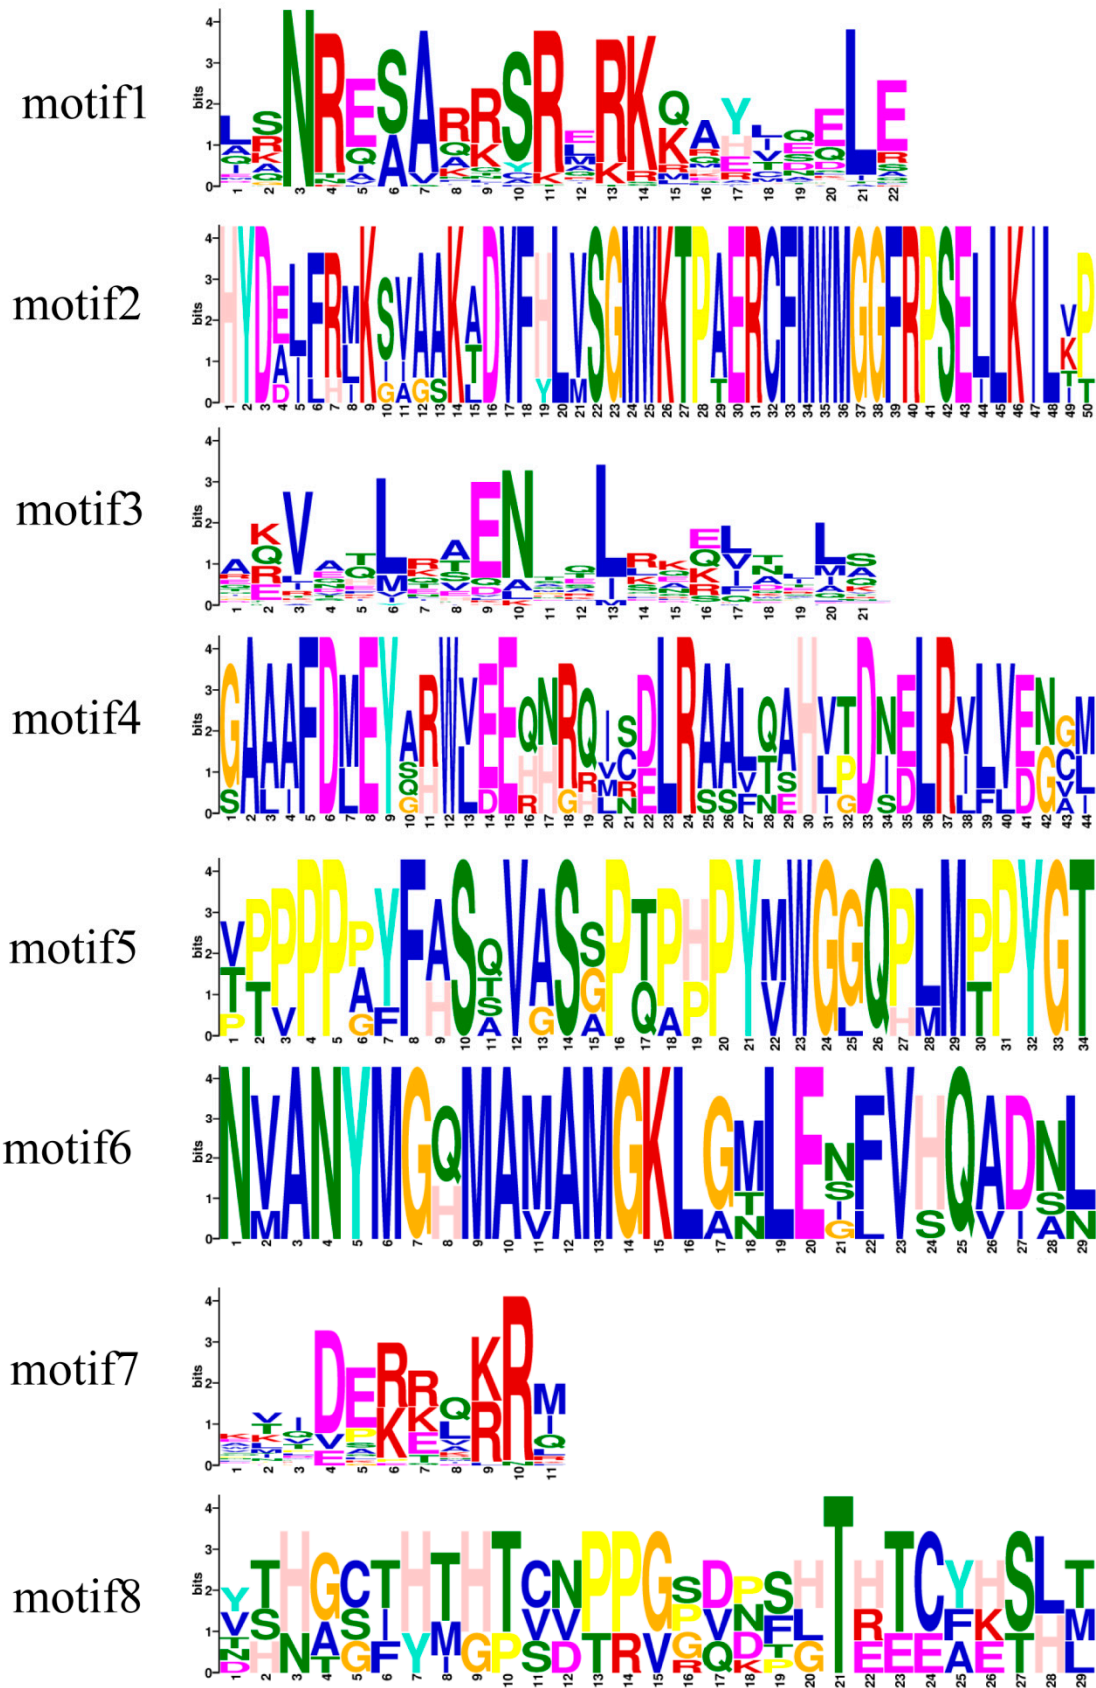

**Figure S1.** The eight conserved motif logos identified within the bZIP family proteins of *P. massoniana*.
