# Supplementary material
Source: MDPI journal article supplement (https://www.mdpi.com/1999-4907/14/1/155)
Supplement: s1 [file s1]

Archive with 7 entries (7 files):
- Figure S1.pdf
- Table S1. Protein sequences.xls
- Table S2. Gene sequences.xls
- Table S3. Primer sequences.xls
- Table S4. FPKM values.xls
- Table S5. Physicochemical properties analysis.xls
- Table S6. Subcellular localization prediction.xls
