# Supplementary material
Source: MDPI journal article supplement (https://www.mdpi.com/1999-4907/14/1/155)
Supplement: s1 [file s1 › Table S1. Protein sequences.xls]

## Sheet: Sheet1
Table S1. The protein sequences of bZIP TFs of P. massoniana
Transcription Factors	Gene ID	Protein sequences
PmbZIP1	transcript_HQ_PmMix_transcript5918/f6p0/3002	MEGLGDGYEAFVGRLKMDMATSNAPKTATGNSLSNPSQSQQVQQARYVGYPSSTNAFTLTREAKPALSDSSGNSMAMDVTIQEPVSSSGTVGVTEPSGNLGHSQNFSTDVNRMPDVPPRRGGHRRAQSEIAFRLPDDIMFDGDLGFSGFDMPTVSDDATEAEDLISMYMDMEKLTSFGEPFNDAAGQGSKLPSGAETNRPPHHSRSLSVDAVFSGLEGNLEDTKGNLGTTGPSRPRHRHSNSMDGSSSSQLNQLSSESLESKKAMAAKKLQELALIDPKRAKRILANRQSAVRSKERKMRYISELERRVQTLQTEATTLSAQLTLLQRDTTGLTTENNELKLRLQAMEQQAQLRDALNEALREKVQRLKIATGQLSSNNTNAFNMSATAQQLPLNRSFF…
PmbZIP2	transcript_HQ_PmMix_transcript6429/f10p0/2977	MGSHEDSRLLGAAAASLPVGGKMGNFSLARQASIYSLTLEEFQNSLGEPGKNFGSMNMEELLKNIWTAEEGQAMAAAMSAAEGTATGNLASQASLQRQGSLTLPRTLSRKTVDEVWRDLYRENTFGNGNGNGNVNGQVNAQRQATFGEITLEDFLVKAGVVREDSTEPYGRLGNGQFGGFGGNSMERNEDRLGISNALALGFSERGVSNGEVINNGAQGTASLSLSPSNNALSNQAVLDAINLETLKASQQQTGWLNNHYRPSTVQQQQQQHHQQLLQHQQQQQMADAAAAIYASSVKRQGNGTMMGQGNGTMMGQGNGAMMGQGNGTMMGQGNGALMGSPLGGGLGLSPTIGGGIGNGLQGGLGVGLVGLGATALTIGAASPANQLSSDGMGNSHGDN…
PmbZIP3	transcript_HQ_PmMix_transcript7678/f19p0/2805	MGTGEEATPTKPAAKPSSSSQETPTTPVYPDWAAAFQAYYGPGATPPPPAFFASTVGSAPTPHPYMWGGQPLMPPYGTPLPYPAMYPHGGIYAHPSMPPGALPYGHYGMPSPGNAEVTTTLALPNAEAEAKSSEGKERNTMKRSKGSLGSLGMITGKGGEGGKATSGSANEAMSQSGDSGSDGSSEGSEEDNTQTESQVARKRSFDQMIVDGANAQSTNIQSYNTQAGEPYVTSGGHAMGNPISQAVAAVPLGSVTGKPATSGPITNLNIGMDYWNATPPGAITTVKGRGSTAGISTAIVPATAQLMPSGRDGVPPELWIQDERELKRQRRKQSNRESARRSRLRKQAECEELATKVETLTVENMALRNELNRMAEECKKLTAENASIMEQLKSHGEDM…
PmbZIP4	transcript_HQ_PmMix_transcript7884/f9p0/2803	MANKIDEQVTAAASYVRSVSLGMQSFVPPLVSHTIGTFGTEASKGYFGELEQTVGFHQDDVAGLAGRSSAVNSRPAVNINHSGALQIAGLAKVQQAPDFTPPSVNSVESRHHSSHRGGAQSGGFVSTSGNRIDPWEDSLMADTSPRTDDTSTDVDTDEKVNQQMDLVRHGGDSSDRTKDKNGDQKTLRRLAQNREAARKSRLRKKAYVQQLESSRLKLTQLEQELQRARQQGIFIGGSCVGGDQSHSMSGNGALAFDMEYARWLDEHHRQINDLRSAVNSHVGDNELRVLVEGVMGHYDEIFRLKSVAAKADVFHLVSGMWKTPAERCFMWMGGFRPSELLKILVTHLEPLTEHQFMGINNLQHSSQQAEDALSQGMDALQQSLAETLASGSLGPPGTS…
PmbZIP5	transcript_HQ_PmMix_transcript8814/f3p0/2698	MSQDPPPEACATADTLRMEMEPLTFSQQESVDLEEFLDDTLFSFPLEEQQWVGSLLDEAFQDDISIPFDDFGNDYAPAFVDEIVSNSQISDGGSATASGNGNGSVSDVDESNGEMTSEAPPHLPPPSSSPPSPADSSSDQSTVVVEDDQRKRKREAEAEDGNKQGLVSSSDITETRTNSSSSRSRCTGDEDEKRKARLMRNRESAQLSRQRKKSYIDELEEKVKSMNSTIAELNNTIAFMNAENIKLKQQLGVLCQPGNAANQHPVTPLPMPYPWPPFPAYPAPVMAGGNGGRVPLLPIPRLKSHSQQQPSTPSKDRKPSKSASAAVSSGQKPAKKKIKKVASVAFLGFFFFIFFLLGGIGQLPDAKDLTLRESSRELLGNGIEGLYRGGLLLKPISGG…
PmbZIP6	transcript_HQ_PmMix_transcript9580/f3p0/2742	MEKAGERHGGIVGQPDLHGKNSNNNNSSKSNHNHNHNNNNNNNIGISSAQPTSGGGFNSRSSQSQPSQPPSRYVGYPSTTNAFTVKQDPSPGPSPSSGPSLSSAPSVSSMRSSASHSVDMQMQDSASSPVPKSLPSNTQLSTMSPHHFSTDVNRMPDIPPRNRGHRRAHSEIAVRLPDDISFDRELGVVGSDCPTLSDEADDDLFSMYIDMDKFTGFSTSSTQAMAATTQSGSEGGLTPPFQSTHHSRSVSMDGVFSGFQNNNSGSAPGGVTSDKPRARHQHSQSMDGFPSIKPELLLSTAEASLAETKKAMSAAKLADLALIDPKRAKRIWANRQSAARSKERKMRYISELERKVQTLQTEATTLSAQLTMLQRDTTGLTNENSELKLRLQSMEQQVH…
PmbZIP7	transcript_HQ_PmMix_transcript10292/f4p0/2624	MGSRTMLSSNGGRTPQFQPLVRQNSLYNLTLEEVQNQLGDASKPLSSMNMDELLKNIWTQEESQAISMAIGNGPMNGVPPNSAPASGGLQRQGSLTIPRTISRKTVDEVWRDIQQSQGKSNEEKKPQQRQSTFGEMTLEDFLVKAGVVREDNNGNSNNNNSSAVTVGIAESPQPVSVCGVPTAGIGMDAMAAAQNLQQQAEWYQYQLNTAQQQQQQQQQQQQQQQNMMVAYGTKRPVPQNGPLGIPGNPLLEGGYGDNQLALSSPLMGCTSSDSQTPGRKRGAPESIIEKTVERRQKRMIKNRESAARSRARKQAYTNELENEVMQLKEENERLKKQQFLEKLLPSVPPPQPKHTLRRTGSAPF
PmbZIP8	transcript_HQ_PmMix_transcript14088/f5p0/2381	MGTGEMGTPAKTTKASTPQEQPPTSTAMLYPDWAAAFQAYYNSGTTPPPPPAYFHSSVASSPQPHPYMWGGQPLMPPYGTLPPPYAAMYHHGSMYAHPSMPPGAHPFAPYVMTSSLSTTEGAPVGTTSGADAEGKPSEPKDQTLLKRSKGSLGSLNMLTGKINEADKGTGGGGNGALSISGESGSEGSSERSDETSQNGSEATQKKGFELNSTKAAEAQNTTTTSYNAHGGSAFGASGVQTVNATVNLAIAAVPISVAGKSATVAGSKTNLNMGMDYWSGSTTATSTIRGKRPAVPRTTAMVPAPQSISLVVPCDGVPTELWDERELKRQRRKQSNRESARRSRLRKQAECEDLAKRVDILKAENASLRKELNRLGEECKKLSTENAFLHKKLCKAPEE…
PmbZIP9	transcript_HQ_PmMix_transcript14618/f2p0/2316	MERVFSVDDILGTFWKLDTQGEGVGETAPSGDMATNRTTTRMSMNRSASEWAFQRFITESAPIPPTSPSGSSSPHIPNHQDLDHKMKKNSSSSTTPTPTPPALVNVEEEEEEEEMREDVKAEKEGKDEKQGSKDKKEEVAAKGVVGNEPSSSSSSSVAVNVNPLSPLLKGTGSVIEKGVVTHTNPQEYESFLKQRLDLACAAVALTRASGIDFHGAPPLTFGAQHSQNLGMESQAGSTISVAQSSGSRPIHNGALGHSVSQPIGIPALPPKPQSATAQIKTTTSGSSREQTDDDDLEAEIEANQSSMDPSDLKRMRRMLSNRESARRSRRRKQAHLSDLEMQVAQLRVENASLFKRLTEMSQKYSEAAVDNRVLRADVEALRAKFAFQVKMAEDMVARA…
PmbZIP10	transcript_HQ_PmMix_transcript11743/f7p0/2494	MEGVGDNSSSFTDLLLQGGGQSSNPRKQQQQMSNSQTGGNNAQSRPLYRSNSQSNNNYAKPPPFPPTSVPSFAQMNNVSNPSQNPTHTRSISQPAFLQGNPFGESNTNLPPLTPTAFSLKRETAASPSLSDPDVTMDEHPIPSPRPPVSPFSADSHSRPDASRTGDVLPPRKGGHRRAHSEIPRQVSWDRVGKGVKKEAEWDRDGDLNMEVGDGEDLFSMYIDLDKLNTLNTTSSANPADIGEGSGESGRKTLNADDDNEDDKAGQDDSGGNSVKEKDIDSGDDDAESESNEKKDGHKRSFPGGGDSTGRSHAAASHHHPHHVRSVSMDSVLSSFQNSENPNQKPSPSPTGRNIKHFHSNSMDGSMNFKLEFGNGEFSGPELNKIMSNEKLAEIAMTDP…
PmbZIP11	transcript_HQ_PmMix_transcript15869/f2p0/2249	MGSQTESRVMVSSHGAMTPALQGGAKMGGFPLARQASIYSLTLDEFQNSLGEPGKNFGSMNMDEFLKNIWTAEESQAMAAAMGAVEGGNGANLQRQGSLQRQGSLTLPRTLSRRTVDDVWREIHKENSDGNGNAPANQARQPTFGEMTLEDFLVKAGVVREDAEQGGGQSFGAFRNALDAEFVANLAERNGDNRLGIGNSLGLGFGERGHRNGEVGSNKSGAGGVPGLSLSPTNVLPNHAAMDMVNLDAFKHQQQQTDWLNNHYRNATAAAFAQQQQQHQQHQQQQQLLHHQAAAEAAAAAAAYATNVKRAGGNAALIGQGGLGGGLALGGTMGNGGLGAGLGGVGGLGAGLGGGFGPSALAIGAGSPTSPLSSDGVGPSHVDNPTISPVPYGMDGGMR…
PmbZIP12	transcript_HQ_PmMix_transcript16962/f3p0/2187	MGTVEGGTQSKATKPYSTMMQEQPATPAYPDWTAALQAYYGPGVTPPPPYFASQVASGPTPPPYVWGGQPLMTPYGTTPPFAAVYHHGGIYTHPSVPPVSVPSGTETEAKSLMGKGRSSIKKIKGNLEKLQILSTKGGTGKALSSSTNGAFPQSGGSGSEGSSEGSEGVNSQNGCETGRARSLEPLTINGTSATDANTLAYNAQVGEANTTVNRSTMALVPPAPVPGMSTVSLPTTNLNIGMGIYNVPAQGSVTPVKGRRGTTNSVSTIAPAASQLIPGHDGVPSELWVQDERELKRQKRKQSNRESAKRSRMKKQMECEELSAKVETLTSENMALRNEINLIAEESEKLASENESLKVMLRNFQRKDRVGDSERNGPRETQSQFMQQGGNGYPQVLSK…
PmbZIP13	transcript_HQ_PmMix_transcript18762/f2p0/2120	MGTVEGGTQSKATKPYSTMMQEQPATPAYPDWTAALQAYYGPGVTPPPPYFASQVASGPTPPPYVWGGQPLMTPYGTTPPFAAVYHHGGIYTHPSVPPVSVPSGTETEAKSLMGKGRSSIKKIKGNLEKLQILSTKGGTGKALSSSTNGAFPQSGGSGSEGSSEGSEGVNSQNGCETGTSATDANTLAYNAQVGEANTTVNRSTMALVPPAPVPGMSTVSLPTTNLNIGMGIYNVPAQGSVTPVKGRRGTTNSVSTIAPAASQLIPGHDGVPSELWVQDERELKRQKRKQSNRESAKRSRMKKQMECEELSAKVETLTSENMALRNEINLIAEESEKLASENESLKVMLRNFQRKDRVGDSERNGPRETQSQFMQQGGNGYPQVLSKISNLSSSQRDEQ…
PmbZIP14	transcript_HQ_PmMix_transcript19444/f2p0/2076	MDTPTKTTKTPTSQEQTSTSTPVAYTEWAAPIQALYNSGKTPVPPGYFHSAVASSPQAHPYMWGLQHMMPPYGTPPPPYVAMYSHGAMYTHPSMPAGAHLYGSYGMSSSGVSNEVTAGAVTASVEGETKSSQAKDRSPLKSTKGSLGSLSMLTGKTNETGKETTANGVFSQSGESGSEGSSEGSDGNSPNGSQSGQKTHFEQGSMEADEAQNGNATSRNGQIANADRASGGQVTTINSSPAMAAVPMSLPGTSGTATGPMTNLNIGMDYWCVTAPTPLSTMRAQLPLSPTTSTIIPSAQNMPAMGTELSLQDERELKRQRRKQSNRESARRSRMRKQAECEELARRVEELKSENLALRAELTRLQEECEKLTAKNNSLTEELKNVHDNESRETRVKDEL…
PmbZIP15	transcript_HQ_PmMix_transcript18867/f2p0/2078	MDPQSTQYISSRRTGGAFDSSSTRQLDMWADSFKADNSPRTGTSSNMEGDAKSEDANRGTVVVSRSSDQEANKPSDKVLRRLAQNREAARKSRLRKKAYVQQLETSRVKLSQLEQELERARQQGIYIGGSSGDHISSANGAANAGAAAFDLEYAHWVEEQNRQISDLRAALTAHVTDIELRILVEGGMAHYDALFRMKSVAAKADVFHLVSGMWKTPAERCFMWMGGFRPSELLKILKPQLEPLTEQQVMSVDNLQHSSQQAEDALSQGMEALQQSLAETLAAGSLGASNVANYMGHMAMAMGKLGMLENFVHQADNLRQQTLQQMSRILTTRQAARGLLAMGDYFSRLRALSSLWAARPREPA
PmbZIP16	transcript_HQ_PmMix_transcript21045/f2p0/1991	MDRQFSFSPADDVEGNSMAVITEEEEEESPVVSARMSRSASEWAFQKFLSFDGSEIWSEDGEGEQKPLGVKDPLLHGHMDNVSAELSPLFAEVKDEVLLPTDPRDCEAFLKRRLNLACAAVAFTRVTGISSPGPGPLTVDANQSQNTLRSERAASLVSQSSATDARAIYVGAVSSTASGPIGIPALPPQPKSGNTQVRTTSGSSREQSDDDDQEVGPSEQSTDPSHVKRERRMLSNRESARRSRRRKQAHLTDLEIQVAQLRVENSSLFNRFTEINQKYNEASVDNRVLKSDVEALRAKVKMAESMVPKAVAAATAGFPPQNSSQVQSAVGLRYRTGIFDSPATNVLQGEDGLYMNIAQSAGTGGSSLTCAISDMNQQNNELQIQHTGSKMGRTPSMQR…
PmbZIP17	transcript_HQ_PmMix_transcript22849/f5p0/1963	MEADVKVDNMSEDVNQLTLARSKRSDQEANQPNNKVLRRLAQNREAARKSRLRKKAYVQQLESSRIKLKQIEQELERVKQQGISINGHLGDHNGSGAAAFDMEYGRWVEEQNRQVRELRASLQAHLTDSELRVLVDNAIAHYDELFRMKGAASKLDVFHLMSGMWKTPTERCFMWMGGFRPSELLKILTPQIEPLTEQQSFAVSSLKLSSQQAEDALSQGMEALQQSLVDTLAGGSLGAPNVANYMGQMAMAMGKLGMLESFVHQADNLRQQALQQMQRILTTRQAARGLLAMGDYFTRLRALSSLWAARPRE
PmbZIP18	transcript_HQ_PmMix_transcript22879/f3p0/1943	MAMDNGELEFSDEAFPNSDHATGFPMISSLDTILDDVTETNTHTCTHTHTCNPPGRDKPHTHTCYHSHTQFFSTEQANQLGGTSESLAKKKRPSGNREAVKKYREKQKAHTAYLEDKVQKLRSLNQQLWRKVQDQVALEAEAERLRAILFEFKGKIDSELGSVPYQKPCSGNVKGGDCSVQPLNGDHNLRCETDVPCFHPPF
PmbZIP19	transcript_HQ_PmMix_transcript25861/f8p0/1849	MDDGDINFSSNIVDDFGNGSSMESFFEEILRDTTHACTHTHTCNPPGPDNTHTHTCFHTHTKILAAPDDEKSADTAESPQNSSSKPKKRPVGNREAVRKYREKKKARTASLEEQVVQLTTVNQQLHRRLQGQAALEAEIARLKCLLADFRGRIDGELGSYPYQKSIRMDKTCNDAPFRQPMPGGYVLDPCNIWCNADAACREPTLASNSEGGVQHERDSAARWNGDCGQIAGHCQGLKGDMAVTSSGLSGCSEGTATKTVPAAMASSGKERKGAFGV
PmbZIP20	transcript_HQ_PmMix_transcript26658/f4p0/1782	MSPPPSYSMFPNSGMGLNPSVTSSEPSSQVSGSIPHQYSGSEEDPKLTIDERKQKRMLSNRESARRSRMRKQQHLDELRAEAAHLRAENSHMLTKFNIASQKYMQLEEENSLLRSYAMDLSLKLQSLTMAMQWAGVLNDVDLGSSTGFIDTTDIKSCYLPSISHPLASTEIYH
PmbZIP21	transcript_HQ_PmMix_transcript3177/f2p0/3431	MEEMDSSYGDLMQRLQSSIGTSSSFIPKQQLNKSEPSSPAVSQTRPPFTANMQNFNPGSKRQGIPPSHPHFPPTPPHSQAFYSQMPVLQSSVQQNSQNQQHSNASPNSLHTRSMSQPHIFNLDNLPPLNPCSYRDPSSPSLSDPVSGDVSMEDQEGSSAVPSISPHNPPSLFSGSRRSQNHMSDGLPPRKGHRRARSDNPFTFMSGSQSLSGDIQQGFGSSLETASVKGTAQMDHLNQYVSSLEREKPKAQAVKTELNQERNSIQNVEGTGEGETGKGGGEDMVSACIDVEKINNLNKSRPASGELPDNLNGAQEDSGGSSVKQKNLKDGDQFSSSDEADSEVNEFNIMKRSNSGVGYEDNKRSGGQGDGNQYRSRHSRSISMDSIMSKMHTFSEDIEQ…
PmbZIP22	transcript_HQ_PmMix_transcript32849/f2p0/1580	MADDAGSPIIKDFEGDLGCDDHDQLKDWLHWDFTDEGFILEDLIPCGEDDACDLGASAVHANAIGFCPDFGDFEGLFVNSSSSASPNNSSDAVDANCHGPRTTEGTALVDGYSVDNKESQSSIHGLVPETRAHGVQDHKILESKRQLRRINNREAAFQSRQRRKSYIQGLESKCKMWENYCNQLQGSIAFVCTENTVLRDELSRCKRQKGSNGVSEPAVLKDSPPLESRSHLTTLVVAGHIIGVHCLEWLLAALTILLLVGAVNPRSVNSTSQAEDEYKSSIFRVSSTFGEKRPVLEAFPVTSSKALSSCRRRYWRLKELLFLSLFHLS
PmbZIP23	transcript_HQ_PmMix_transcript33510/f4p0/1635	MQDTAASTSTQHQSTSEKSSSSAAPAQFRQAKDAIESDDDIRRVPEMGGMQAGPSTCVPMRLDNPQPSTGVVAHRKRGRAPADKEHKRLKRLLRNRVSAQQARERKKAYLNDLETRVKEIEHKNSELEERLSTLQNENHMLRQILKNTTMKKKGSGNSGAET
PmbZIP24	transcript_HQ_PmMix_transcript39468/f2p0/1317	MGSQAVLAPSEFRFLQPLERRVEKLHGAGSAGNSNVEDGLLSSPPCAMQRQVSVAAGGSLDQVWRDIHRPNFQTTQAAAVENFLAQTGLGQREDEEEEEEEDGLNRGNNGSLTIFAMDSVLAGQNLQQPEWLQFQHQHQQFGELSAQANSNIDIPVVAASSGSEHPVWKKRGCESITDHTVERRQKRMIKNRESAARSRARRQAYTNELEIEVNKLIEENARLRKEQEAANLLHSVQPGQTKHPLRRTTTAPF
PmbZIP25	transcript_HQ_PmMix_transcript45213/f3p0/1067	MQGTAPDLSGSATGDKFFTSSSGDPHEEARNECVNESDDDIRRVPEMGVQTGVVVNSDLVVKTESERGLSGSGSQRRRGRTPADKEHKRLKRLLRNRVSAQQARERKKAYLNELETKAKELQQRNSELEERVSTLQNENFMLRQVLKNMTAKNKGGGVGEVEG
PmbZIP26	m.16472	MARKNKENKNMALSTMLRDEGDSSEDDYRRKRDKNNQAVKRSRVKSRMRTQQTLQRVNQLKTENDMLEEKIKLLSKELGFLKELFMAQAGTSQIELPKSVDLKTLLSDTTSDILDNDLTKPPSSS*
PmbZIP27	m.15705	MEGLVDEFLNMCANEKNKCDRQALGITNSSNSTNDITMYREDEPYLDMFQMVDAPVAPFPTTQNVFTINDDFQKITELEVKPTVLSENTAFKQPISTRKNSTLKLDVGLKPVLSTSYGDILNTPEVVKTLTEQESSFNLLAYVCDDKNPDNLVEVPTPKNVTNVSPTSQWSRKRRSSNSSASVQTDDDDYPKHKKPNEDYHSSDDKYRQLRDRNNLASRKSRATRKARENELNSSFSQLETINRRLTIKAEELEKMVNDMRQALLKIMTKNK*
PmbZIP28	c100348.graph_c0	MPRDQVNRISPERAKHLERNRIAANKCRIKKKREHQAIQNSLHNETARHDSLMAELSTLREEIWTLKNTVFAHASCNDHHINRQLANMSENLVGASPNQLQIPSPSLSSPSSSDGFAVENRKGSNAVSEDSEGQLFTDPALYETNFDGIGEFSFDRLIDMENA*
PmbZIP29	c104458.graph_c1	MTDTLNPMDLPGSPDFPLTVSPADTSLESPEPEGDGEGEDVDLDDVEIKEEDKKPTKKRKSWGQELPTPKTNLPPRKRAKTDDEKEQRRIERVLRNRAAAQTSRERKRLEMEKLETEKIRMEEQNQFLLQRLTQMEVENSRLSQQVAQLSAQVRSSRSTTPISNKASSPPPVPAITESPTLTPTLFKQEGEELPMERIPFPTPATSALEYSPTLQPSTLAETSDATQHPAAVLCDLQCP
PmbZIP30	c110670.graph_c0	MDPQSTQYISSRRTGGAFDSSSTRQLDMWADSFKADNSPRTGTSSNMEGDAKVDKSEDANRGTVVVSRSSDQEANKPSDKVLRRLAQNREAARKSRLRKKAYVQQLETSRVKLSQLEQELERARQQGIYIGGSSGDHISSANGAANAGAAAFDLEYAHWVEEQNRQISDLRAALTAHVTDIELRILVEGGMAHYDALFRMKSVAAKADVFHLVSGMWKTPAERCFMWMGGFRPSELLKILKPQLEPLTEQQVMSVDNLQHSSQQAEDALSQGMEALQQSLAETLAAGSLGASNVANYMGHMAMAMGKLGMLENFVHQVIANSCCFWQQISKQTIYASRHCSRCLAFLQLVKLQGVFLLWGIILAAFERSVLSGQHVLVSQRKVMIIFNCYSSADSASDL…
PmbZIP31	c110853.graph_c0	MSFTLENFDLGNFLASEVDAFSQTGANLKNPHGYVDYDNFQDFLSPRNGQESLDSDLPYSWFDYNRNQPQIKTEPISDIVPVESLPPSMFFQPPTAFSQPVEQSKAQPHEEAQNEAQDEAHAQPEELPPSPSMHPKDEDYNSDEESDATAKPTPKRAPRRSAAAGKSKQKAIGSPNVIDSPQNKRKRSLTPLPATSSRRSSVMDTEMQELTNNSTIELPKIQKTAHSSQFVPPDTSNLPKREARLLKNRAAAFLSRQRKREAFELLEEKVIDLEKEKQQLQLERDTAIAGERRMLEELRQLQAQFGQPMQQ*
PmbZIP32	c113425.graph_c0	MQSEQVLLPSSPMVSNGSFHMGTVDTRGGQDFLTRECYESLLNFNNFMLYPPPTLNTNSSPEVCKPSPKGRYIRQDSIASTSQSAQTACNSASDEAEEQQTVMIDERKKRRMLSNRESARRSRMRKQKHLDELRAQVAHMRAENRQILSSFDILSQRYSQILEENRVLKTQTTELSQQLHQFQQAITASQ*
PmbZIP33	c115759.graph_c0	MEDDELHFTNQDVFRGIDMSDDISSRCFAGSIFDELLKDTHACTHIHTCNPPGPDNSHTHTCFHTHTRLVLASEGEDSLDNSGQNSSSNSRKRPLGNREAVRKYTEKKKAHTASLEGEILQLKAQNQKLMKKIQSQSLLEAEITRLRCLLADLRSRIDGELKSYLHQQQPRTDKHGDSSLQIMPGRCALSSGNVNLNLVNLSCNADLPCPHTDFQNECYDAKNKCQSLQVSVHASRGVSVCSDCSLTSMGPIDISPGEQRKTGVGMPQCLSDRSVSGC*
PmbZIP34	c123024.graph_c0	MLPLLSGSSQRPLIASSAPLQGFGVRNINMNGVVPILKTSQQPSSSSCFHPPTAGLTNLQTWENNTRLKLNPAPPSRPAAEISSKSMAPPPSTKLNLPPCTTNSTGSSSSMTYGSCPPSSSHSGSEEEEQQQQGQQKEKKKNVIDERKQRRMLSNRESARRSRMRKQQHLDELRAQIVQNEKTTALG*
PmbZIP35	c126579.graph_c0	MESETVTVADFSIFGAEGVIIKPGSETFVPGFPFFTDLQSNQMLVSHSNEMDLYNNSLIPISPAQFSREIYDMGRTQYGNMPFSGNLNTPGSISEVPTERSVPVSVNEGYPTEDSLHSPGRNGEAMSHIWGHSASDKTEEQQVREERKQRRMLSNRESARRSRLRKQHLVDQLKAEVDHLRAENGEILKKLNIASAHYAHIREENSLLRSEAMDLSHKLQRLQYTLNAQPHGVFESMGVETRNCSAAHMSSAYGTIAHSLVSPHLWF*
PmbZIP36	c65560.graph_c0	MADTINPLDTLPTSPDRELYSVSPADTSLDSPEPEDDIKEEDDEKKPTKKRKSWGQELPTPKTNLPPRKRAKTDDEKEQRRIERVLRNRAAAQTSRERKRLEMEKLETEKIRMEQQNQFLIQRLSQMETENNRLSQQVAQLSAEVRGSRSVTPKASSPAIESPTLTPTLFKQEGDELPMERIPFPTPSATD
PmbZIP37	c76997.graph_c0	MTSLYSSPTTCDPSTLLSSPSTSSLKSTSVTPNSNKKRRLSTPDSSATSFSLDRSSPGESSNGQRGAMDPERAARLAARAARNRISAQNSRDRKKQHVGQLEEEVNQLRHDKAELAQRVKTLEGLVYSLLSSQQSSCTSLPSSSSVPLSTATPSTELQADLPITSVASNSQSRAEGHIVPVAAPTTPTVSDSASSTLRTSGLAHDSSKAADHARLPAAETTSSFAESDDAPQRAWKSQPFHIAHSQSSTRRAKKPALKLQRQSMAAAPKSKSTTRSLRRIVKVTKLPKSSSQMDSMMSADRKRLSRATMAAGWTTSWRTSQTTRQTFLPTSKRLRHIRIILRTRKANGRLKF*
PmbZIP38	c89688.graph_c0	MKTAHVTPERARHLERNRIAANKCRERKKREHKLIERRLSDETEKKEILLAQLNCLREEVWGLKNIIFQHAECEDHQINSQLARMTQSVLKNVEISPEASQPELSNEASTSPTSQTWSEEDHALKLEPTYDEWPIPELYDPMADAMFENFIQAENPYT*
PmbZIP39	c99575.graph_c0	MAATDVLPPSPAASQSWNNFEDFLDFPSPCATPRLAPVGPAVASSLSQQALPSSTASLDAQAGLSTSTPPPPGSSPEALFRYYLAAELRKIGSDADDTIIDRYVAQHYHSFSRAMDRQNQKSDTEMDRAFRSPPPPTEQTSAPFLLQNSLSSNATGAIDPSFVELSHISNSLSQSSPAHTEESMQSYRTKTEDDMSEDEEQEEDDQLGDLPKGNTEALRRTARTSPAIEDTPIAGSIMGPANELRPDPETYRNLSSKEKRQLRNKISARNFRTRRKEHISHLEQQVADRDTVIEGLRQQLAQVNVHNKELQDEVTSLKTKIVSNPDMARLLDALQKTANTTGQTADTASNPNSLLVRSTSNSSLADAASPRPMSPRANSSLARPNTRKDVPATQSGATR…
PmbZIP40	TRINITY_DN15584	MAHHGASDNSAANWGYTSSSSKLPQLPPKSPSFGIVGQDSSNNNIMYMGWPNFSFQGNSLKHQRTPSVGYLSSHGQPPWMDDLLDSPSENPAKKGPHHRRSASDSLAFLENPVASAPIEEIAEEDEFDCRSAASIPSKGSQDFDRLDEDQLMSMFADIEPFHKQQNQSNQPVSNNLHAGLSTALDNRCSERQTISENPSTPSDHNSINETSMEEKVMTVSGQFKSEPEVQSVCKSEQPLQQPVKIEMPTSSSTMELDPNIDPKRVKRILANRQSAQRSRVRKLQYISELERSVNALQTEVSTLSPQVAYLDHQRVVLNVDNGSLKQRIAALAQDKLFKDAHCEALKKEVQRLRQLYQEQQQQNMQKEVAAPSTGSYDLQQQQFGKLEHNSSPQMMEQKT…
PmbZIP41	TRINITY_DN15743	MHTPPTAPSLGRADSVAHSEQTITSPLSKRSFDDMSDSDDGDVSVKAEAIETPLRKRKPMRKRAKTQEEKEQRQHERIMRNRAAAQISRERKREYVAHLEVEKQELCDQVTTLSSQNTDLRKTVDTLSARLASME
PmbZIP42	TRINITY_DN22882	MADRGPNSQRLSSPEISTWNKQILSGMLQGIPSPYAANFVSNSGLESLKDQHEAYDLGEFEQSLILNLDAEGDHHPGLAERQGFGSRPATLNIFPSWPMRFEASPKSTSQSADSTVSGSAQYTASACKADTQIELESPSSTRLQQEAVQVSDMAGNSLRTETSNELEKYAKPETNHRAPTSSCEHEAASKTLDAKTLRRLAQNREAAKKSRLRKKAYVQQLESSRMKLSQLEQDLQRARTQGVFLGAGFVADQGHPGLSPGAAIFDMEYSRWLEERHGRLCELRAAFQAHIPDNDLRLLLDNCLRHYDEIFRLKSIAAKTDVFHLVSGMWKTPAERCFMWMGGFRPSELLKILVPQLEPLTEP
PmbZIP43	TRINITY_DN26938	MDIELENSLLVLTAASLLKRKMPEEMPRAGLGSYAEEDKSPLSNRKKARKSKTTLSAEHFLDVNVNVSFTTKAERRAAKHQDPSSGSEENNSDASPPQSSISPSALVARLDPNLPLSATLDRGLLLTMSSKEFESFFTQLCAERSLTRSEEKMLKAQRRLISNRESAQASRRRKKAYIEELEGRVLEMTYKMSQVAANNAALSAQTAELLSENANMKMKMEEMAKALRAS*
PmbZIP44	TRINITY_DN27810	MADSRSQQRVFIPELASASTINCSKQPSYGMLQGVISTSCPSNIMASPAVDFFKDNPGAYDLGELDQALFSYLEGDSSGLAQKQCSGGNRSRATLNMFPSKPMHFEPSPPSLSRATSVSGGDSFDSQSAQQTNINSFKRAPQQPEFESTTSAKKSEMMQITDMGRNNSPATEKFNELDKDVKHEVNRRAHTSSSEPEGTKTPDAKTLRRLAQNREAARKSRLRKKAYVQQLESSRIKLAQLEQELQRARTQGVFMGPNGYLNDQSHLTGNAASNGGLNSAAAFDMEYQRWLEEHHRHMCDLRAALQEHLPDNDLRVFVENCLAHYDDLLHIKIVGAKTDVFYLVSGMWKTPAERCFMWMGGFRPSEILKILIPQIEPLTEQQYQCIYSLQQSSLQAEEA…
PmbZIP45	TRINITY_DN39226	MQSEQVLLPLSPMISSGSFHLGVDDTRGSQDFLSRECYESLVNNNYYMLYPPPTLSNNGNNSSSSPEACKPLPKGCYIRQDSAGSSSHSAQTACNSASDEAEEQQHTIIDERRERRMLSNRESARRSRMRKQKHLDELRAQVAHMRAENRQILSSFDILSQRYSQILEENRVLKTQTMELSQ
PmbZIP46	TRINITY_DN39403	MQSEQVLLPSSPMVSNGSFHMGTVDTRGGQDFLTRECYESLLNFNNFMLYPPPTLNTNSSPEVCKPSPKGRYIRQDSIASTSQSAQTACNSASDEAEEQQTVMIDERKKRRMLSNRESARRSRMRKQKHLDELRAQVAHMRAENRQILSSFDILTQRYSQALEDNRLLKVQAMELSQQLHQFQQAIAASQSSAAPHFALNALQASHHHNNNNNIISIDDAVDNNTNSLPQCPDILL
PmbZIP47	TRINITY_DN45689	MASQGDGDKSGGNCGQKTNLPRPVLKNPPFRTIGSNVVDSNCNSFKGWSDFPFHNNNSKHQFFPSVGYLAHFQPPWNDDLIKSPMESPTKKTSHRRSASDSLPFLEAPTDCFADGDKLDCRQDVSLSLRESMDSENLEEIQPMSIFSDVEAFQKQKDQADGSTVTAPSISGSLASLSDYNSFKDPLMFEAKLNVSSQFRSEPEDASICKGEQDDQPVKIESSETTPPDLKVDKKRIKRIIANRQSAQRSRIRKLHYISELEESVTALEVEVSTLSPQVAFLDHRRATLIIDNNTLKERIAALVQENLFRDEHSEALKTELQRLEQLYQQQQQMQCRQQRIEHAISSNAAFDFQQH*
PmbZIP48	TRINITY_DN46630	MSLKDFPTFDGSADFANAASAGLSANNNTNNLLDEQQLFCNPDFFGNSPAVSFFSTPELGYLDTPDTVISHDFDLVYSPQLSKESSHKSVDKYGALDRDPMFRDVTLFPSTAFDESIASTFNNTTPDSTIGELFVDAASLELTPRVEHASLPSAPPSLSSASSFEMPPPRTKPIHLGKMQRPRKRQASDGDYAPHSILGKRSASSVDDEDDDVKAMLRAKNTEAAARSRARKKAAMEEAEKRIAELEAENASLKAQLAL
PmbZIP49	TRINITY_DN52036	MDNIFGSTLSLNGLLSDPFFCGDDADEFLSELGGSCIADDFVAPKQPAKQASSHSSSLSGSDTADNFPSTNSGPLYISTEATQQIWPASGPMVGPMMAAAPAQMVRGSNPEGQPMDSAAMLTQLLTTMQASAQQPVKQESLMSARPAQPASAASTVTLPSLTAQQQQALQAIMSLGSLGSTPEGKKVRRMLSNRESARRSRHRKQAHMQDLESKVNGIEAENESLKLSVAKFQEQEARFNSERSHLYAEIAALRAKVAQLEQGASTADGCVSGLKRSQEDLGVYGDSPSKRQAFCPT*
PmbZIP50	TRINITY_DN54691	MPIHPAQFSREIYDMGSTQYSNMPFSANLDAPGAKSEVPTERSVPVLVNEGYPSQDSLHSPEANGEAISHFWRHSASDKAEERPVKEERKQRRMLSNRESARRSRLRKQHHLDQLRAEVDHLRAENGEILEKLNIISQHYAHITEENSLLRSEAMELSHNLQRMEYTLNAQPHPHGVSESMGVETRNCSAAHMRAYSTIAHPLVSTHLWF*
PmbZIP51	TRINITY_DN55838	MGSEIAAEAAFSYFGSDRMNIETESERFVQDFPSLTWLQSNQMLISHSNQISLHRNSVTPTHPAQVDREIHETESTQYKNMPFSANLIAPGPKTGVPTEISVVVNRCPNQDSLHSGASNGDDITHSQSNSASYEAEEEQVIDERKQRRRLSNRESARRSRLRKQHRLNELSAQVVRLRAENEEILKKINITSQHYALVTEKNCLLRSEALDLSHKLQELQHKLNAQSHGVFRTMGIETRNCIAAHMISESATIAQSSWVPPDLWF
PmbZIP52	TRINITY_DN56271	MSFKYVELNKLVHVLNEPVKQDERELKRQKRKQSNRESAKRSRMKKQMECEELSAKVETLTSENMALRNEINLIAEESESLKQRNLKACF*
PmbZIP53	TRINITY_DN58935	MMDEDKYVGRKGETDEEKRKNFLERNRQAALKCRQRKKQWLQNLQAKVEFYGHENDQLTAQVTSLREEIVNLKTMLLAHKDCPVARNNSMGGLGDMQQMQSVQY*
PmbZIP54	TRINITY_DN64764	MNDMGNNNRGVCLDGNNSYSGWEHALQTANDAPTDTTTMTQLSSLNDTMGTMLPSPTLSQHDSSFLSSFHPSTTSSTGPTPASSSSGSGATKRSLDSPSSTSGNSPAEPTKVQKRQKNTEAARRYRQRKVDRVTELEEALAAVSRERDELKLRLAR
PmbZIP55	TRINITY_DN89156	MSDWRDGFSNTAGQTSLEKSAPLWQNHDNSTMQAHTRQLQANERNLAASSMSNEQLFSAIVRMDVPPAPSSSLPAGMQQRQSSVSIEQAKSALKAARASAGSKTAGKQEQGNDSGSDDDDGSPDGSVGKSKRVLANRQSAHRSRLRKLQYIQDLETNVSRLQAELGQIHPQLAFLRDKYNGLAETNRRLRERVGALLNEAHFKECLNSSLRSEITQLSTIQPGQQLGSDAPASAANSASVGFSAQQPNASHIKH*
