# Supplementary material
Source: MDPI journal article supplement (https://www.mdpi.com/1999-4907/14/1/155)
Supplement: s1 [file s1 › Table S2. Gene sequences.xls]

## Sheet: Sheet1
Table S2. The gene sequences of bZIP TFs of P. massoniana
Gene Name	Gene ID	Nucleic Acid Sequences
PmbZIP1	transcript_HQ_PmMix_transcript5918/f6p0/3002	ATGGAAGGGTTAGGGGATGGTTACGAGGCATTCGTAGGGCGTTTGAAGATGGACATGGCCACAAGCAACGCACCGAAGACCGCTACAGGGAATTCACTCAGTAATCCTTCTCAGTCACAGCAAGTGCAGCAAGCTAGGTATGTAGGTTACCCATCTTCTACCAATGCATTCACACTGACTAGGGAAGCAAAGCCAGCTTTATCGGATTCTTCGGGGAATTCAATGGCCATGGATGTGACTATACAAGAACCTGTGAGCTCGTCTGGTACTGTCGGCGTTACAGAGCCCTCAGGGAATCTAGGCCATTCACAGAATTTTAGTACTGATGTCAATAGGATGCCGGATGTTCCACCCCGGAGAGGAGGCCATCGCAGGGCTCAGTCGGAAATTGCTTTTCGC…
PmbZIP2	transcript_HQ_PmMix_transcript6429/f10p0/2977	ATGGGTTCCCATGAAGATTCAAGATTGCTGGGTGCAGCGGCTGCTTCGCTTCCTGTTGGAGGGAAGATGGGAAATTTCTCGTTGGCGAGACAGGCTTCTATCTATTCCCTTACCTTGGAGGAATTTCAGAACAGTCTTGGGGAGCCTGGGAAGAACTTTGGATCTATGAATATGGAGGAACTTCTCAAGAACATATGGACTGCGGAGGAAGGGCAGGCAATGGCTGCAGCTATGAGTGCAGCAGAGGGGACTGCAACAGGAAACCTTGCAAGTCAGGCCAGTTTACAGAGGCAGGGTTCGTTGACCCTTCCTAGGACACTGAGTAGGAAGACTGTGGATGAAGTATGGAGAGATTTATACAGAGAGAACACTTTTGGGAATGGGAACGGGAATGGGAAT…
PmbZIP3	transcript_HQ_PmMix_transcript7678/f19p0/2805	ATGGGAACTGGGGAAGAAGCAACGCCAACTAAGCCTGCTGCCAAACCATCTTCCTCCTCCCAGGAGACACCGACAACACCTGTTTATCCAGATTGGGCAGCTGCTTTCCAGGCATATTATGGTCCAGGTGCTACCCCACCTCCTCCTGCCTTTTTTGCTTCAACAGTGGGATCTGCACCAACTCCACATCCATACATGTGGGGTGGACAGCCGTTGATGCCACCTTATGGGACTCCACTACCATATCCTGCAATGTATCCACATGGAGGAATCTATGCACATCCTTCCATGCCTCCGGGTGCACTTCCGTATGGCCACTATGGAATGCCATCACCTGGCAATGCTGAAGTTACAACGACTTTAGCACTTCCAAATGCTGAAGCAGAAGCCAAGTCCTCG…
PmbZIP4	transcript_HQ_PmMix_transcript7884/f9p0/2803	ATGGCGAATAAAATAGATGAACAGGTTACCGCGGCTGCATCTTACGTTAGAAGTGTTAGTCTCGGCATGCAGAGCTTCGTCCCTCCGCTGGTCTCTCACACAATCGGCACGTTTGGAACAGAAGCCAGCAAAGGCTATTTTGGAGAACTTGAGCAGACTGTGGGTTTTCATCAGGATGATGTAGCCGGTCTTGCTGGCAGGAGTTCCGCTGTGAATTCTAGACCAGCCGTCAACATTAATCATTCTGGGGCATTACAGATTGCTGGCTTGGCCAAGGTACAGCAGGCCCCCGATTTTACCCCTCCTTCCGTAAACAGTGTGGAATCACGACATCATTCTTCTCACCGAGGAGGTGCCCAATCGGGAGGTTTTGTATCTACATCGGGCAATCGGATAGAC…
PmbZIP5	transcript_HQ_PmMix_transcript8814/f3p0/2698	ATGTCTCAGGATCCCCCTCCTGAAGCCTGTGCTACGGCAGATACCCTGAGAATGGAAATGGAACCCCTGACCTTTTCGCAGCAAGAATCGGTCGATCTGGAAGAGTTTCTCGACGATACCCTGTTCAGTTTCCCTTTGGAAGAACAACAATGGGTCGGCAGCCTGTTAGACGAGGCATTCCAGGACGACATTTCGATACCCTTCGACGATTTCGGAAACGATTATGCACCAGCTTTTGTTGATGAAATAGTGTCGAATTCGCAGATCTCCGATGGCGGATCTGCAACAGCAAGTGGAAATGGAAATGGAAGTGTAAGTGATGTTGATGAGAGCAATGGTGAGATGACCTCGGAAGCTCCTCCTCATCTTCCTCCTCCTTCTTCTTCACCGCCCTCACCG…
PmbZIP6	transcript_HQ_PmMix_transcript9580/f3p0/2742	ATGGAGAAAGCTGGTGAAAGGCACGGTGGTATTGTTGGGCAACCTGATCTTCATGGGAAGAATTCAAACAACAATAACAGCAGCAAGAGCAATCACAATCACAACCACAATAATAATAATAACAATAATATTGGTATCAGTAGTGCTCAACCTACCAGTGGTGGTGGTTTCAATTCACGCTCATCTCAATCCCAACCCTCTCAGCCGCCATCCAGATATGTTGGCTACCCTTCCACTACAAATGCTTTCACTGTAAAACAAGACCCATCTCCAGGCCCATCCCCATCTTCAGGACCATCCCTATCATCTGCCCCTTCAGTGTCGTCGATGAGATCCAGTGCTTCTCACTCTGTTGATATGCAAATGCAAGACTCTGCATCTTCTCCTGTTCCCAAGAGT…
PmbZIP7	transcript_HQ_PmMix_transcript10292/f4p0/2624	ATGGGTTCCCGCACAATGCTGTCCTCTAATGGCGGCCGGACACCTCAGTTCCAACCACTCGTTCGTCAGAATTCTTTATACAATTTAACGCTGGAGGAGGTCCAGAACCAGCTCGGGGACGCCAGCAAGCCGCTTAGCAGCATGAACATGGACGAGCTCCTGAAGAACATTTGGACACAAGAGGAAAGCCAGGCTATATCCATGGCGATCGGCAACGGTCCCATGAACGGCGTTCCTCCCAACTCTGCCCCTGCCAGCGGTGGTTTGCAGCGTCAAGGGAGCCTTACAATTCCCAGAACTATCAGCCGCAAGACTGTGGACGAGGTGTGGAGAGATATTCAGCAGAGCCAGGGAAAGAGCAATGAAGAGAAGAAGCCTCAGCAGAGGCAATCCACGTTT…
PmbZIP8	transcript_HQ_PmMix_transcript14088/f5p0/2381	ATGGGTACAGGAGAGATGGGGACACCAGCGAAAACAACTAAGGCATCCACACCACAGGAACAGCCTCCAACAAGCACTGCCATGCTTTATCCTGACTGGGCTGCAGCATTCCAGGCTTATTATAACTCTGGAACCACACCACCACCTCCTCCTGCGTACTTTCATTCAAGTGTTGCATCTAGTCCACAGCCTCATCCATATATGTGGGGGGGGCAGCCTCTAATGCCTCCATATGGAACTCTTCCTCCCCCATATGCGGCAATGTATCATCATGGCAGCATGTATGCTCATCCATCCATGCCTCCGGGTGCACATCCATTTGCTCCTTATGTGATGACATCATCGTTAAGTACAACTGAAGGTGCACCTGTAGGCACAACTTCTGGTGCAGATGCAGAA…
PmbZIP9	transcript_HQ_PmMix_transcript14618/f2p0/2316	GAAAGTCAAAAAGGGTTGTTTCCACCGATAATCCCAAAATCGGTCTGCTCTCCTCGCAAGTTGCGTGTTTACCCACGAAACCAGACGTACGGACACGACCAATGCGTTGCGTTTGCTTTGTTGGAAGGGATTTCAGATCTGCTTGGTTCAATCTCAACCTCAACCTCAACCTCAGCCTCAATCTCCCCAATCCAGATTCGATTCTTGTCCAGAAGAGTCAGTGTGTATGAGATAGAGAAGCTGCAGTAG
PmbZIP10	transcript_HQ_PmMix_transcript11743/f7p0/2494	ATGGAAGGAGTCGGCGATAACAGTAGCAGCTTTACGGATCTGTTATTGCAGGGCGGAGGTCAGTCATCGAATCCTCGGAAGCAGCAGCAGCAGATGAGTAATTCTCAGACAGGAGGTAATAATGCTCAATCCCGGCCTCTTTACAGGTCGAATTCCCAGAGTAATAATAACTATGCAAAGCCTCCACCGTTTCCCCCAACTTCAGTGCCTTCTTTCGCACAGATGAATAATGTATCGAACCCTAGTCAAAACCCCACGCACACGAGGTCGATCTCGCAGCCCGCATTCTTGCAGGGGAATCCCTTTGGGGAGTCCAACACCAATTTGCCTCCCTTGACCCCCACGGCGTTTTCTTTAAAGCGAGAAACCGCAGCGTCGCCTTCGCTGTCAGACCCGGAC…
PmbZIP11	transcript_HQ_PmMix_transcript15869/f2p0/2249	ATGGGTTCTCAGACTGAGTCTCGTGTAATGGTGTCTTCCCATGGTGCAATGACGCCGGCTCTTCAAGGCGGAGCAAAGATGGGAGGGTTTCCATTGGCCAGACAGGCTTCTATATATTCATTGACATTAGATGAGTTTCAGAATAGTCTTGGTGAGCCAGGCAAGAACTTTGGGTCCATGAATATGGATGAGTTTCTTAAGAACATTTGGACTGCAGAGGAAAGCCAGGCTATGGCTGCAGCGATGGGGGCAGTAGAAGGGGGAAATGGTGCTAATCTTCAGAGGCAGGGCAGTTTGCAGAGACAGGGATCATTGACTCTGCCCAGGACTCTAAGTAGGAGGACTGTCGATGATGTATGGAGAGAGATTCATAAGGAAAACAGTGATGGGAATGGGAAT…
PmbZIP12	transcript_HQ_PmMix_transcript16962/f3p0/2187	ATGGGAACTGTGGAAGGTGGAACACAGTCAAAGGCTACAAAACCATATTCCACGATGATGCAGGAACAGCCAGCCACACCTGCATATCCTGACTGGACAGCAGCCTTACAGGCATATTATGGTCCAGGTGTCACACCTCCTCCACCTTATTTTGCCTCCCAGGTTGCATCAGGGCCAACACCACCTCCATATGTGTGGGGAGGACAGCCATTAATGACACCTTATGGGACGACCCCTCCATTCGCTGCAGTGTATCACCATGGAGGAATCTATACACATCCTTCTGTGCCTCCGGTTTCAGTCCCTTCAGGCACTGAAACAGAAGCAAAGTCCTTGATGGGTAAAGGTCGAAGCTCAATAAAGAAGATAAAAGGAAATTTAGAAAAACTTCAGATACTT…
PmbZIP13	transcript_HQ_PmMix_transcript18762/f2p0/2120	ATGGGAACTGTGGAAGGTGGAACACAGTCAAAGGCTACAAAACCATATTCCACGATGATGCAGGAACAGCCAGCCACACCTGCATATCCTGACTGGACAGCAGCCTTACAGGCATATTATGGTCCAGGTGTCACACCTCCTCCACCTTATTTTGCCTCCCAGGTTGCATCAGGGCCAACACCACCTCCATATGTGTGGGGAGGACAGCCATTAATGACACCTTATGGGACGACCCCTCCATTCGCTGCAGTGTATCACCATGGAGGAATCTATACACATCCTTCTGTGCCTCCGGTTTCAGTCCCTTCAGGCACTGAAACAGAAGCAAAGTCCTTGATGGGTAAAGGTCGAAGCTCAATAAAGAAGATAAAAGGAAATTTAGAAAAACTTCAGATACTT…
PmbZIP14	transcript_HQ_PmMix_transcript19444/f2p0/2076	GGTGAATCATATCGTATAATCCACCTGTGCAGACCCGCTGGCAATGGCGAACACCATTTGTCTCTGAGATCAGTGCGCTACCTTCATCCAATCCCCTTCAACAAACCTCCACGTCGGTTTTGTCCTCGTCCACCTCATCACCGGATTCTCTCGGCCCCTGCATGCTTCAGTTTTCCTCGGTCGTCCCGCAGCAATCCAGCAGAAGAGATGGACACACCGACAAAAACAACAAAGACGCCTACATCACAGGAACAAACTTCCACAAGCACTCCCGTGGCTTATACTGAGTGGGCTGCACCAATACAGGCTCTATATAATTCTGGAAAGACACCAGTCCCTCCTGGTTACTTTCATTCTGCTGTAGCATCTAGTCCACAGGCTCACCCATATATGTGGGGA…
PmbZIP15	transcript_HQ_PmMix_transcript18867/f2p0/2078	ATGGATCCTCAGTCAACTCAATACATCTCTTCAAGAAGGACAGGAGGTGCTTTTGATTCTTCATCAACTCGTCAACTTGACATGTGGGCAGATTCATTTAAGGCTGATAATAGTCCACGAACTGGAACATCTTCAAACATGGAGGGTGATGCAAAGTCAGAAGATGCCAACCGTGGAACAGTAGTAGTGTCAAGAAGTTCTGACCAAGAAGCAAACAAACCTAGTGATAAGGTCTTAAGACGGCTTGCACAGAACCGTGAGGCAGCTAGGAAAAGTCGTCTGCGGAAAAAGGCTTATGTTCAACAACTTGAAACAAGTCGTGTGAAGTTGAGCCAACTAGAACAAGAGCTGGAGCGAGCTAGGCAACAGGGAATTTATATTGGAGGAAGTTCTGGGGAC…
PmbZIP16	transcript_HQ_PmMix_transcript21045/f2p0/1991	ATGGACCGCCAATTCTCATTCTCTCCTGCGGACGATGTCGAAGGGAACTCCATGGCTGTAATTACCGAAGAAGAAGAAGAAGAAAGCCCCGTGGTTTCAGCGCGAATGAGCCGTAGCGCCTCAGAATGGGCCTTCCAGAAGTTTCTCAGTTTTGATGGTTCCGAGATTTGGTCAGAAGATGGAGAAGGCGAACAGAAGCCTCTCGGTGTTAAAGATCCTCTGCTTCACGGTCATATGGACAACGTCTCTGCGGAGCTCAGTCCTCTCTTTGCCGAAGTCAAGGATGAGGTTCTTCTTCCTACTGACCCTCGAGATTGCGAGGCCTTCCTCAAGCGGAGGCTTAACCTTGCCTGCGCGGCAGTCGCCTTCACTCGGGTTACAGGAATTAGCTCTCCAGGC…
PmbZIP17	transcript_HQ_PmMix_transcript22849/f5p0/1963	ATGGAAGCAGATGTGAAGGTGGATAATATGTCAGAAGATGTAAATCAGCTAACGCTTGCAAGATCAAAAAGGTCTGACCAAGAAGCAAACCAACCTAACAACAAGGTCTTGAGACGACTTGCTCAAAACCGTGAAGCAGCAAGGAAAAGTCGTTTGCGAAAGAAGGCTTATGTGCAACAGCTTGAATCTAGTCGAATAAAGCTGAAACAAATTGAACAAGAGCTTGAGCGAGTGAAGCAACAGGGAATTTCCATCAATGGACATTTGGGCGATCATAATGGATCAGGGGCTGCTGCATTTGATATGGAATATGGGCGTTGGGTTGAAGAACAAAACAGACAAGTCCGTGAGCTCAGGGCTTCTTTACAAGCACACCTGACAGATAGCGAACTTCGTGTT…
PmbZIP18	transcript_HQ_PmMix_transcript22879/f3p0/1943	ATGGCAATGGACAACGGAGAGCTCGAGTTCTCTGATGAAGCCTTTCCTAATTCTGACCATGCTACCGGCTTTCCCATGATTTCATCCTTGGATACCATTCTGGATGACGTTACGGAGACAAACACACACACTTGCACCCACACTCATACTTGCAATCCCCCAGGACGCGACAAACCACATACTCATACTTGTTATCACAGCCATACCCAATTTTTCTCTACAGAGCAAGCAAATCAATTGGGTGGGACATCAGAGTCATTGGCAAAGAAGAAAAGGCCTTCTGGAAACCGAGAAGCGGTCAAAAAGTACAGAGAGAAGCAAAAAGCACATACTGCTTATTTAGAAGATAAAGTGCAAAAGTTGCGTTCATTAAACCAGCAGCTATGGAGGAAGGTACAA…
PmbZIP19	transcript_HQ_PmMix_transcript25861/f8p0/1849	ATGGATGACGGAGACATTAATTTTAGCAGCAATATAGTAGATGATTTTGGCAATGGGTCCTCCATGGAAAGCTTTTTCGAGGAGATTTTGAGGGACACTACTCATGCCTGCACTCATACACACACCTGCAACCCTCCCGGGCCAGATAACACACATACACACACATGCTTCCACACGCACACAAAAATCCTTGCTGCTCCCGATGACGAGAAGTCTGCAGACACTGCTGAGTCTCCACAAAACAGCTCTTCCAAGCCAAAAAAACGACCAGTAGGTAATCGAGAGGCAGTTAGAAAATACAGGGAAAAAAAAAAGGCCCGGACGGCCTCCCTGGAGGAGCAGGTTGTTCAACTGACCACTGTTAATCAGCAATTGCATAGGAGATTACAGGGTCAAGCA…
PmbZIP20	transcript_HQ_PmMix_transcript26658/f4p0/1782	ATGTCTCCTCCCCCATCATATTCCATGTTTCCCAATTCAGGAATGGGCTTAAATCCCTCAGTGACATCTTCAGAACCCTCTAGTCAGGTCTCCGGATCGATCCCCCATCAATATTCAGGCTCCGAGGAAGACCCTAAACTGACGATCGATGAAAGAAAGCAGAAGAGAATGCTTTCTAACAGAGAATCTGCAAGGAGGTCCAGGATGAGAAAGCAACAGCACTTGGATGAATTGAGAGCCGAAGCAGCTCATCTCAGAGCAGAGAACAGTCATATGCTAACAAAATTCAACATTGCTTCACAGAAATACATGCAGCTGGAAGAAGAGAATTCTCTTCTGAGGTCCTATGCCATGGATTTAAGCCTCAAGCTGCAGTCCCTGACTATGGCAATGCAGTGG…
PmbZIP21	transcript_HQ_PmMix_transcript3177/f2p0/3431	ATGGAAGAAATGGACAGTAGTTATGGCGATCTTATGCAGAGGCTTCAGTCTTCTATCGGGACTTCATCTTCCTTCATTCCTAAACAGCAATTAAATAAATCTGAACCTTCGTCTCCGGCTGTTAGTCAAACTCGGCCCCCTTTCACTGCAAATATGCAGAATTTTAACCCCGGAAGCAAAAGGCAGGGGATTCCTCCTTCACATCCTCACTTTCCTCCCACTCCGCCTCACTCACAAGCATTCTACAGTCAAATGCCCGTTCTACAGTCATCGGTACAGCAGAATTCTCAGAATCAGCAGCATTCCAATGCTAGTCCTAATTCTTTGCATACTCGATCGATGTCCCAGCCTCACATTTTTAACTTGGATAACCTGCCTCCTCTCAATCCCTGTTCATAT…
PmbZIP22	transcript_HQ_PmMix_transcript32849/f2p0/1580	ATGGCAGATGACGCGGGTTCTCCAATAATTAAAGATTTCGAGGGCGATCTTGGGTGTGATGATCATGACCAACTTAAGGATTGGCTGCACTGGGATTTCACTGACGAGGGTTTCATCTTGGAAGACCTCATCCCATGTGGAGAGGATGACGCTTGTGATCTCGGCGCCTCGGCAGTCCATGCAAATGCTATAGGGTTTTGTCCAGATTTTGGCGATTTCGAGGGTTTGTTTGTAAATTCTTCTTCTTCAGCTTCCCCAAACAACAGCAGCGATGCGGTGGATGCGAATTGTCACGGCCCCCGAACTACCGAGGGAACCGCCCTTGTGGATGGCTATAGTGTTGATAACAAAGAGTCGCAGAGTTCGATTCACGGTTTGGTTCCTGAGACCCGGGCCCAT…
PmbZIP23	transcript_HQ_PmMix_transcript33510/f4p0/1635	ATGCAGGACACTGCTGCTTCCACATCTACACAACATCAGTCAACAAGTGAAAAATCTTCAAGTTCAGCGGCTCCAGCCCAATTTAGACAAGCCAAAGATGCAATTGAGAGCGATGATGATATCAGGAGGGTTCCTGAAATGGGAGGAATGCAAGCAGGTCCATCTACATGTGTGCCTATGAGGTTAGACAATCCCCAACCTAGCACAGGCGTTGTTGCCCACAGGAAGAGAGGGAGAGCCCCTGCAGACAAGGAACACAAGCGTCTCAAAAGATTGCTTAGGAACAGAGTGTCTGCCCAACAGGCAAGAGAAAGAAAGAAGGCATATTTAAATGATTTAGAAACAAGGGTTAAGGAGATTGAGCACAAGAACTCAGAGTTAGAGGAAAGGCTTTCCACT…
PmbZIP24	transcript_HQ_PmMix_transcript39468/f2p0/1317	ATGGGGTCCCAGGCAGTGCTCGCTCCTTCTGAATTCAGGTTCTTGCAACCCCTGGAAAGGCGGGTAGAGAAGCTTCACGGCGCTGGCAGTGCAGGAAATAGTAACGTGGAGGACGGCCTTCTCAGCTCCCCACCTTGTGCCATGCAGCGCCAGGTGAGCGTTGCAGCCGGGGGAAGTCTTGATCAAGTCTGGAGAGACATTCACAGGCCTAATTTTCAGACTACTCAGGCCGCGGCGGTGGAGAATTTTCTTGCACAGACGGGCCTTGGACAGCGGGAAGATGAAGAGGAAGAAGAGGAGGAGGATGGCCTGAACCGGGGCAACAATGGCAGCTTGACCATATTTGCAATGGATTCTGTTCTTGCAGGTCAAAACCTGCAGCAACCGGAATGGCTGCAA…
PmbZIP25	transcript_HQ_PmMix_transcript45213/f3p0/1067	ATGCAAGGAACAGCTCCTGATCTTTCTGGATCCGCAACCGGTGATAAGTTCTTTACATCCAGTTCGGGCGACCCACATGAAGAAGCGAGGAACGAATGCGTGAACGAGAGTGATGATGATATCCGGAGAGTGCCAGAGATGGGAGTACAAACAGGTGTGGTTGTGAACTCTGATTTGGTTGTGAAGACTGAGAGTGAGCGGGGTTTGTCTGGTAGTGGCAGTCAGAGGAGAAGGGGCAGAACGCCTGCTGATAAAGAACACAAGCGTCTGAAAAGATTGCTGAGGAATAGAGTGTCTGCTCAGCAAGCGAGGGAGAGGAAGAAGGCTTATTTGAACGAGCTGGAGACCAAGGCCAAGGAGCTTCAACAGAGGAATTCCGAGTTGGAAGAGAGGGTTTCA…
PmbZIP26	m.16472	ATGGCTCGTAAAAATAAAGAGAACAAAAACATGGCTCTATCAACCATGTTGAGAGATGAAGGCGATAGCAGTGAAGACGACTACCGGCGTAAACGGGATAAAAATAATCAGGCGGTTAAAAGAAGTCGAGTAAAAAGTAGAATGCGTACACAACAGACATTGCAACGTGTGAACCAACTAAAAACTGAAAATGATATGCTTGAGGAAAAAATTAAACTTTTAAGTAAAGAACTGGGATTTTTAAAAGAATTATTCATGGCACAAGCTGGCACATCACAAATTGAACTACCCAAATCTGTTGACCTGAAAACATTACTGAGTGACACTACATCGGATATATTGGATAATGATTTAACAAAACCCCCATCTTCGTCCTAA
PmbZIP27	m.15705	ATGGAGGGCTTAGTGGATGAATTTTTAAACATGTGTGCAAACGAAAAAAATAAATGCGATAGACAAGCACTCGGGATTACAAATTCAAGTAACAGCACTAATGACATAACAATGTACAGAGAAGATGAGCCATATTTAGACATGTTTCAAATGGTGGACGCGCCAGTAGCGCCTTTCCCGACAACACAAAATGTTTTCACAATCAATGACGACTTTCAGAAGATTACCGAACTAGAGGTCAAACCAACTGTTCTTTCAGAGAATACAGCTTTTAAACAGCCAATATCGACAAGAAAAAACTCAACACTTAAATTAGATGTGGGGTTAAAACCAGTTCTGTCAACAAGTTATGGCGACATATTAAACACACCAGAAGTTGTAAAAACTTTAACAGAACAA…
PmbZIP28	c100348.graph_c0	GCAAGGGTGATCGACCAATTCTACCATCTCCCATTTAACTTCTTAAGAACATCAATTTCGATTCTCTTCTCGAAGCTATTCACAAAAAGTGAAGCTCAAGTTGACAATCATCTAATCGCGACCGATTCTCCCACCACCTATTTCACGTTCTATCTATTTGATCGCAACTCGATCAATTCATCACACACTTCACAACTTGCCAGTGTGATACTATCGCCAACTCCGAATATCCCCGACAATGCCACGCGACCAAGTCAACCGCATCAGCCCCGAGCGAGCAAAGCACCTCGAGCGAAACCGAATCGCCGCGAATAAATGCAGGATTAAGAAAAAGAGAGAACACCAAGCCATTCAAAACTCCCTCCATAACGAAACAGCCCGACACGACTCTCTCATGGC…
PmbZIP29	c104458.graph_c1	ACGGACACTGCAGGTCACACAACACCGCTGCAGGATGTTGTGTCGCATCGGAAGTCTCAGCCAGCGTGGAGGGTTGAAGAGTAGGGGAATATTCGAGGGCGGAGGTGGCGGGAGTAGGGAAGGGAATACGCTCCATAGGGAGTTCTTCACCTTCTTGTTTGAAGAGAGTGGGAGTAAGAGTAGGAGATTCGGTGATGGCGGGAACAGGAGGTGGAGAGGAGGCTTTATTGGAAATAGGAGTTGTACTTCGAGAAGATCGAACTTGGGCGGATAATTGAGCCACTTGTTGACTTAATCGGGAGTTTTCGACTTCCATTTGGGTAAGTCTTTGAAGGAGGAACTGATTTTGTTCTTCCATGCGAATCTTCTCTGTTTCTAACTTCTCCATTTCTAACCGTT…
PmbZIP30	c110670.graph_c0	TGAAGCCCTAACGCCGCGCAAACGAAAGAAGAGATCGGGGTTTTAGCGCGTATTTTTGGGGGAGGAAAGCTGTCTCCAGGTCTTCGAGATGTTGGACTGTACTCATGGCTTCGAACCGGGGGCATCCGACGGAATCATTGGCGTCATTTACAGCTGAACGCTGCTGTGACGGTCTATAAACAATTTGTCTTCTGAAACCAGTGAGAGAAGTGCAAATATTATTGATGGATGCCGTTGGTCAACACGAACACAGGCACGTGGACTAGTTGAAGCAAGCCTTTTGCTAAGCTACCATAACTGGGTATCTATTCGGCCAAATTTGTTGGGGACTTGCACCAGAGCTGTCGCAAGTAATGTTTTTTAACAAACACGAGCACAAACAAAGCATGTCTTAGTACA…
PmbZIP31	c110853.graph_c0	CAGGAAATTCTTAACTGCAGTCCAGATAATTGGTGCCTTAGCGTCTAACACCCTTCTTCCATCACAATCTAATTAATTAAAATATAATGTCATTCACTCTAGAGAACTTTGATTTGGGAAACTTCCTAGCCTCTGAAGTAGATGCATTCAGCCAGACCGGTGCAAATCTAAAGAATCCCCATGGATATGTAGATTATGACAACTTTCAAGACTTCTTAAGCCCACGCAACGGTCAGGAATCATTGGATAGTGATCTCCCTTACTCTTGGTTCGACTATAATAGAAACCAGCCACAAATAAAGACAGAACCGATCTCAGATATTGTACCAGTCGAGAGTCTACCACCATCGATGTTCTTCCAGCCACCTACTGCTTTCTCCCAGCCAGTTGAACAATCAA…
PmbZIP32	c113425.graph_c0	TATGAATTAACCTTTACCATTAAACTTAAAATGCCTCTTCGACTTAGAAGTGACATAACATCATGGACTCATGTGACCATATCGCACTATAACTTGACCTCAACAATACTTGACACGATTAGCGGTTTTTCACGAATATACCTATATATCTTCCTACGCTACTGTGCTATATTTTCTGCTAAATTAAGCTGACCAGGAATGTACAGACTGGGTGCCTTGCTAACAGTGCAAGGGATTCTGTGGATATTGATTTGGGAATCATCCTGAATTGAAAACTGTACCTATGGGGTTTTTCAACTGGTCACCGACGAAGCTTTAAATTAGGACTCTACAGTCCTCTGCTCACTGAGAAGCCGTGATGGCTTGCTGAAACTGGTGAAGCTGTTGGGACAATTCCGT…
PmbZIP33	c115759.graph_c0	GTCAGGAAGACATGTTTGATGTCTACAGAACGATTTTCAAAAATTTTGTATGGGAGATACTGGTAGAATCTTGATTCCTGGGTAAGAAATGAGAGCAAGGCAAGAGGCAGAGAATGAATAGAGATTGCTGATGATGGTCTTTAAGTCACAGAATATTTATCTCACTTGCAAACACAAATTCTATCCATCTGCATGCAATCTTATTCTCATATTTGCAACAATGACGCTTACTGAAAAAAAAGAATTCAGTGATCAAAGCGCAGCAAAACATAATTACCCAATATGTGTTTACTGAATCTTGAAACTTTCAAAGCCAAAGCTTCTATGCTCTCTTGTCACTTCCTTTGTTGGGAATTTCGTTCCACATTAACATGATTACTACATCTTGAGATTAGCAGC…
PmbZIP34	c123024.graph_c0	GGAAAGTCCATCAGATAAGACAAACTTTACCAGGATCATATGTTGGAATTTGGGTTCGAACCTGTGACCCCAGGCCTCTACAGCCTGGAATTGTCTTTACCCCACAATTTTGGGGCAGGACAGGACATTGAGGTACAGTTTTTGGTTGAATAGGGCATTGATTGTTTCTTGGTCTGCCCATTAGGGACTTTAATGGGTACCTGAGATTTAGCGATGGCCAGCTGAGTGGACTGAATTCGTGGCATTACAGTTCTGCCAACTGTAAAAACTTTGCTGAATTAGCGGCACCTGCTGAGGTTATGGAGGACCATTAGGAGTTAGGACCCTTTAGCGAAGGGACAGGAGGGCGTCCCTGGCCCAGTTGGCACAGTCCATTTGTGCAAATCACCATCGTTGTTG…
PmbZIP35	c126579.graph_c0	GCAAAGTTCCTGCATGAATGAGAAAACAATATAGGGCATGGTTCTGGTAATAACTCAAGTATTTCACAATGTAAATTGCTTCTGGAACTCAAAACCAGAGATGGGGAGAAACCAAGGAGTGAGCAATGGTGCCATACGCTGAGCTCATATGCGCAGCACTGCAATTTCGAGTTTCAACACCAATACTTTCAAACACACCATGAGGTTGACTGTTTAATGTGTATTGTAATCTTTGGAGGTTGTGACTCAGCTCCATGGCCTCTGATCTCAACAGGGAATTCTCTTCTGTTATATGAGCATAATGCTGTGAAATAATATTGAGTTTCTCCAATATCTCGCCATTCTCTGCTCTCAAATGATCCACCTCAGCCTTAAGCTGGTCCACAAGATGTTGTTTCC…
PmbZIP36	c65560.graph_c0	GTCGGTGGCGGAGGGGGTGGGGAAGGGGATGCGCTCCATGGGGAGTTCATCGCCTTCTTGTTTGAAGAGAGTGGGGGTGAGAGTTGGGGATTCGATGGCGGGGGAGCTGGCCTTGGGGGTCACACTGCGCGACCCACGGACCTCGGCGGAGAGCTGGGCCACTTGTTGGCTCAGGCGGTTGTTCTCCGTCTCCATTTGGGAGAGACGCTGGATCAAGAACTGGTTCTGTTGCTCCATGCGAATCTTCTCGGTCTCCAGCTTCTCCATCTCCAGGCGCTTGCGCTCTCGGGATGTTTGAGCTGCCGCGCGATTCCGGAGAACCCGTTCGATCCGACGCTGCTCCTTCTCATCGTCTGTCTTGGCGCGTTTGCGAGGGGGGAGGTTTGTTTTGGGGGTGGG…
PmbZIP37	c76997.graph_c0	CGAGCCATGAATCTATGCTAGACTCTAGTGTTTCCCTCTGCATATTTTTCCAATGGCTGTCCACCGTGATCTGGCCATCGTCTAAAATTTTAGTCTCCCATTCGCCTTCCGTGTTCGTAGGATGATCCGAATATGCCGAAGGCGTTTGGACGTTGGAAGAAAAGTCTGTCTGGTCGTCTGCGATGTCCTCCAAGAAGTTGTCCATCCAGCTGCCATCGTCGCTCGTGAGAGCCTCTTGCGATCCGCTGACATCATCGAATCCATTTGTGAGCTGCTCTTCGGAAGCTTCGTTACCTTGACAATTCTGCGAAGTGATCGAGTGGTCGACTTGCTTTTCGGTGCTGCTGCCATTGACTGTCGCTGCAATTTCAGAGCTGGCTTCTTTGCTCTCCTCGTCGA…
PmbZIP38	c89688.graph_c0	GCGAGCGCAAGAAGCGGGAACACGTCAGGAAGACAACCTGAGCCACCGAAATCCAAATCCAACCGAACATGAAGACCGCCCACGTGACCCCCGAGCGGGCTCGGCACCTCGAGCGCAACCGCATTGCCGCCAACAAGTGTCGCGAGCGCAAGAAGCGGGAACACAAGCTCATCGAACGCCGTCTCAGCGACGAGACCGAAAAGAAAGAGATCCTCCTGGCCCAATTAAATTGCCTCCGTGAAGAAGTCTGGGGCCTCAAGAATATCATCTTCCAGCACGCCGAGTGCGAAGACCACCAGATCAACAGCCAACTGGCCCGCATGACCCAGTCCGTCCTCAAGAACGTCGAGATCAGCCCGGAGGCTTCTCAGCCCGAACTCAGCAACGAGGCCAGCACAT…
PmbZIP39	c99575.graph_c0	GAAATAGCATTATACAAGCGGTGATGTGATGAGAAGCAATGAGACATTTATGTGCTAGGCAACTGCCTGTGAAGACTGAACAGGCCAGCCATGGCCGCCGACACCGCCCCAAAAGGCGCGCGTAGCACCACTTTGGGTGGCCGGAACGTCCTTGCGAGTATTGGGACGTGCCAGGGACGAGTTGGCTCGAGGCGACATGGGCCGTGGTGAAGCGGCATCGGCCAAGGAGGAGTTGGAGGTGGAGCGGACCAGCAGCGAGTTCGGATTGGATGCAGTGTCTGCCGTCTGGCCAGTGGTGTTGGCTGTCTTCTGCAAGGCATCCAGAAGACGAGCCATATCGGGGTTGCTGACGATCTTGGTCTTCAGGGAGGTCACTTCGTCTTGCAGTTCTTTGTTATG…
PmbZIP40	TRINITY_DN15584	GGGGGTTGCCACCGTCAACGACCGGTGGCGATTTAGTAGCTCAGCACTGGGAAACCGAAAAAAAAACCCGAGAGGGGGAACGAGCGAGCCATGATGCTTGGGGAAGAAGCGATGGGGAAGAAGGACAGTGGGAAGATGCCCCCAGCCCCGCTCAGAACATTTCAGGCTTTTTAGTGTTTTTAAAGCTGGATTTTATTGTTAATGTATACATATTTTTATTTTCCATGGTGGGTTGAAGCTGGCAATGGCAATGACAATGACAATGTGAGAGACATTGTTACGACTCTGCCAGCGGATTCGAATTATATTGGTCTTCACAGCGATTTGCAGACCCACAAGATTTGTGTGTCTGAAGAAGGGTCGCTGTTCTCCAGGAATCTGTGCTTTAGATTTGATTTG…
PmbZIP41	TRINITY_DN15743	GCTCCATCGATGCTAGACGTGCCGACAAGGTATCGACCGTCTTGCGTAGATCTGTGTTTTGCGAGCTGAGAGTAGTGACTTGATCACATAGCTCCTGCTTCTCTACCTCTAGATGCGCGACATACTCTCTCTTGCGCTCTCTGGAGATTTGTGCAGCCGCACGGTTCCTCATGATGCGTTCGTGTTGACGTTGCTCCTTTTCCTCCTGAGTCTTTGCACGCTTGCGCATTGGTTTACGCTTACGCAGCGGTGTCTCAATAGCTTCTGCTTTGACGCTGACGTCTCCATCGTCACTGTCAGACATGTCATCAAAGGAGCGCTTTGATAAAGGAGAGGTGATTGTCTGCTCTGAGTGTGCTACTGAATCCGCCCTGCCTAATGATGGTGCTGTTGGTGGTG…
PmbZIP42	TRINITY_DN22882	GAAGGGGAAATCAAAAGGCTGATTATCTGTCTGTAGGGCATCACATTTATTTCAGCTATATAGCCAGCCTGAAGCCAATTTTTAACTTTGTTCAACCAGAATTCAATGGCAGGGAGATTGCTAATTATGAAGCCTAACTGATTAGAAGACCATATCGTTTATTTTTGTTTATGGGTTTATGAGGGAATTCTCCTGACTTCATGTTATCAATATTAGTGTTCATCAGTAGAATTGCCTGGCTCTGGGGACTTTGAGACGATGCTCAGTGCACAGCATGGCAGATAGAGGGCCAAATTCTCAGCGGCTTTCATCTCCAGAAATCTCGACTTGGAACAAACAGATCCTCTCCGGAATGCTTCAAGGAATTCCATCGCCCTATGCCGCGAATTTTGTATCCAA…
PmbZIP43	TRINITY_DN26938	GAATCGAGCGGGAGCAGCCTCTTCTGGCTTGGCGCTGTAACACCATCAACTGTAACACCTCGCGTCACTCCCACCACCTCTTCTTTGTCACAACTGCAACAACATGGATATAGAACTAGAGAACTCTCTGCTGGTGCTGACAGCAGCCAGTCTTCTCAAGCGGAAGATGCCAGAAGAGATGCCCAGAGCCGGTCTCGGAAGTTACGCAGAAGAGGACAAGAGCCCTCTATCCAACAGAAAGAAGGCGAGAAAGTCTAAGACAACGCTTTCGGCGGAACACTTTTTGGATGTCAATGTGAACGTCAGTTTCACCACAAAAGCCGAACGCCGCGCCGCCAAGCACCAGGACCCCTCTTCTGGTTCAGAGGAGAACAACAGCGATGCATCCCCTCCGCAGTC…
PmbZIP44	TRINITY_DN27810	ATGTACAAAAGTATCTCGGTGTTTCAAGCTTTTGCAGTAGTCAAGTTTCAACCAGTAATTTCAAAAACTATTTTTCTGTAAACCATCACTAAGAATTCACTATCTGCAAGCCTGATTAGTAGCATGCAGGTGTCTAAAAGTCACAGATCATGATCATCAATGGTGAAAGTTAACGTGATGAGCAGGAGACTCTGATCTCAGAGCATAAATCGAATTAATAATGCACAATGTTGTATGAATTCTAATTCTAAACTTGGAGCTTATCCCATGGTAGGAAATTAGCCATGCAGTACAAATTATGATGAAAAAACTATGGACCCAACCTAATTAATTATCCAATGAAGGCTCATTGGAATGATGATCTGCAAAGTGATTAATACTCATTCTCTGGGTCTGGCT…
PmbZIP45	TRINITY_DN39226	GTTGGGACAATTCCATAGTTTGGGTCTTCAAGACACGATTCTCTTCCAAAATCTGGCTGTAACGCTGACTGAGTATGTCGAAACTGCTGAGAATTTGCCTGTTCTCAGCTCTCATGTGCGCCACCTGAGCGCGGAGCTCGTCCAGATGTTTCTGTTTTCTCATGCGGGACCGCCGGGCGGATTCCCTATTGGACAACATCCGCCTCTCCCTCCGCTCGTCAATTATTGTATGCTGCTGCTCCTCAGCTTCGTCCGACGCAGAATTGCAGGCGGTTTGAGCCGAATGGCTGCTGGACCCGGCGGAATCTTGACGAATGTAACAACCCTTGGGCAGGGGTTTGCAGGCCTCCGGGCTGCTGCTGCTATTGTTGCCGTTGTTACTGAGAGTGGGAGGAGGAT…
PmbZIP46	TRINITY_DN39403	CTGATTCTCTAATTGCTTCATTTTAGATGGATTGAACATGCTCTCAACTTAGAAAAATGGAATCCCTAATCACACAGACAAACTTTAGTCTGAGTGAAGTTCTAGATGGAGCTGTACTGGCTAGCTATGGTGGCTTTTCCTGCATACACTATATGAGCAGAGCAGACTGTTGCATTTTTTACAGTAGAGGAGCAAACGATGGATGAAATATATATGGTATATGTATCTAACTGACCTAAACAATGGAGGAAGCAGCAATCTATGAATATATGTAACTAACTAACTAACTGATGGGAAATGGGCACTGATAGTAGAGTTGTCAGAGAAGGATATCAGGGCACTGAGGTAAACTGTTTGTGTTGTTATCCACTGCATCATCTATGCTAATAATGTTATTGT…
PmbZIP47	TRINITY_DN45689	GCCTGCTGGATTCTGCTAATATTGTTCTGGCATTCTTTCCAGCTATTTTATTTTATTTTTTGGGTTAAGGATTCAGCTTTGATGTCATGGGTGTAATTCCCTCCCTCATCCCTCTGACACTATTCCTGCAAGTGCCCAATAATTTGGGGCATTGATAAGTACATTGCAGTCCCAATTTGAAATCCAGAGATTTTTTAATATCTGTGGGACAGATTTTGACTTTTGGGACGAAGCATTGAGACTTTTAGGCGCGTATGGAGTGTTTTTTAATTAGACTGAGCTGCACACTTCACTGTTTCAGGTTTTGGGAGAGACAGAAATGCAGAATATCAGGTACAAACTTAAAATCCAAGTTAGGAGAAGAATTCAATTAATATGCCAATTGAACAATTGAATAGA…
PmbZIP48	TRINITY_DN46630	GCGAGTGCAAGCTGTGCTTTCAGCGATGCATTCTCGGCTTCAAGCTCAGCGATCCTTTTCTCTGCTTCTTCCATAGCGGCCTTCTTGCGTGCACGACTACGCGCAGCAGCCTCGGTGTTTTTGGCACGAAGCATTGCTTTTACATCGTCGTCCTCATCGTCCACTGAGCTAGCACTGCGCTTTCCGAGTATCGAATGCGGTGCATAGTCTCCATCCGATGCTTGTCTCTTTCGAGGACGCTGCATCTTGCCAAGATGAATTGGCTTGGTTCTTGGTGGTGGCATCTCGAAGGAGCTGGCAGAAGAGAGAGATGGAGGAGCCGATGGAAGGGATGCATGCTCGACTCGAGGTGTAAGCTCGAGACTGGCAGCATCAACGAAAAGTTCTCCAATAGTAGAG…
PmbZIP49	TRINITY_DN52036	TGTCCTGGTTCTTCCTCAATCTCAGAAGTCTGTCCGCCAAGAATGTTCTCCAAGTATGCAAAACTGATACAAGCAGTGCTCTTCATTGGTCAGGCGAGCTGTCTCAATGCATTCACCGCTATCATCACAGACAATGGCTTCAAGGTCTAATAGCCCACAAGGAACAAAGTCGCAAGCGGCTACAACCCGTCATAAACATTGTCGATCGACTGGGGCTGAAAGAAAAATTGCGCCCATAGAAAAATCAATGACGAAACACGGGGAGGACCTAATCATGACTGCAAAGTTCTAGTGGAAACCTCTAAAACCTTGCCTATACCCTAGCAGGACTCAGAAGCCCTGCGTTAAGTTTCCTAGGTCCTATGCTGGGACAGACTGATGCTTCCACCGCGTTGCCGC…
PmbZIP50	TRINITY_DN54691	GGGGGGGACCTATGTGTTTTTTATATTATTTTATGAAAGGTTCTTCCAATCTCACTTCAACGTTATTCTTCAATCTTCTTATGGGGGTGACCTTATGACTGCTCTGCGGCTCAAGGGTTAATGAATATCAAAATTTACTTTTTCCTTTCATTTATTGTTTTAAAGGATTGAAAACTCTCATTACATAATTTCAGAACAAAAAATAATAATTTTTTCCAAAGTTCAAATATCAAAAACTACAACCTTTTACACCATTCAAATCAATATCAAGTTCCTGCATGAATGAGAAAACAATATAGGGCATGGTTCTGGTAATAACTCAAGTATTTCATTAGGTAAATTGCTTCTGGACCTCAAAACCAGAGATGGGGAGAAACCAAGGAGTGAGCAATGGTGCCA…
PmbZIP51	TRINITY_DN55838	TTGGTGCCATCTTCAATCTAAATGCTGAATTGGTGCCATCTTCAATCTAAATGCTGAATTGGTGCCATCTTCAATCTAAATCGACTGATTACAGGAAACAAAAGGGTTAGTCTAGATGGGTAGCCTGGTTGGTTGAAGCTTTGCCAAGTCATTGACCCTCTGTCATGTCATAAGAGGTTGGTTCTAGTCCCAATTGGTTGAAGCCCCAACCAAGTTATTGATCCTTTGTCATAAGAGGCCGGTTGAATTCTCTTTGGGTCCATCAAGATCATGCTCCCAGTGATAGAGTCTACTAGGTAGCGTGGCATTAGACAAAGGTTCAATTCTCCTTGTGTCCACCAAGGTCAGGCTTCCAGCTACGGGTGGTAGATTCGACTGGGTGACCCGTCTAGGAACTTT…
PmbZIP52	TRINITY_DN56271	GGAAAGTAGAAGTGCAAGTCTGGAAGAGTCTAGTTTTCTTCTGAAGGGTGATTTTCTTGAGAAGGAAGGTCAGTTATCAAAACTTTATGCATGCGGTGAAGAAGCTGAAAAACCCGCTTCACTACTTGTAGAACAAGAGCAATTGAGACAGATGGCTCATGACTTGGAACAGGAGAAATTAGAAATGGCAAATACCTCGGATGACTTGAGATCCCAGCTGCAAAGCAAAACCCTGGAAATTACACAGCAGAATCTTCATGATTCCATTGAACAGAAAGGTACACTTGCAGTTGCCAGTGATTCTGAGACAAAAGTGACTTACATTGAAGACTTGGAAAAAGCAACTGGTTTGTTGGAAGAGAAACCCCAGATATCTCAAACAGATGGGGAACATTTGAC…
PmbZIP53	TRINITY_DN58935	AGATGATGGATGAAGATAAGTATGTCGGTCGCAAAGGTGAGACAGATGAAGAGAAGAGGAAAAATTTCTTGGAAAGAAATAGGCAGGCAGCACTTAAATGTCGTCAACGCAAGAAACAGTGGTTGCAGAATTTACAAGCAAAGGTCGAATTCTACGGTCATGAGAATGATCAGTTGACTGCTCAAGTAACGAGCTTGAGGGAGGAAATAGTCAATTTGAAGACAATGCTGCTTGCGCACAAAGATTGTCCTGTTGCAAGGAACAATAGCATGGGAGGTCTCGGAGACATGCAACAGATGCAGAGCGTGCAGTATTGAGCGAGG
PmbZIP54	TRINITY_DN64764	ACACCACCGGGTACCTTACACCCTTCCCCCTTATATACACCACCGTCGCCACCGGCCTCGGCGTCACAAGAGGCCGCCCGATAACCTCTGCAACAATGGCTACAGGATCATACCTACCAGACTACCCCAGAGGACTCGCAGCCTCTGCTTTACGGGCCCGCGGACTTTTCTTCGTCCTTGACGGATGATCTCCACTGGTTGACGGGAGGAACACACGATCTACCGCTTTTCGAATTGGATAACACGACTACGAATACTACTACCACTACTGGAGGATCTGTTCAGGATCCCTTCCTCGCGTTTGCGAATTTCCAGACCGACGATGAGATTATTGCGCAGGTTATGAACGACATGGGCAACAACAATCGGGGCGTCTGTCTGGATGGGAACAATTCTTAC…
PmbZIP55	TRINITY_DN89156	ACACGGGTCTGTCAAATTTGCCGATGATTGATTGTTGATGCCAGTGTAGCTTAGAAGCATGAGTGACTGGAGAGATGGCTTCAGCAACACTGCGGGACAGACCAGTCTCGAAAAATCAGCACCTCTTTGGCAGAACCACGACAACAGCACCATGCAGGCTCATACTAGGCAGCTGCAGGCTAATGAACGGAATCTGGCAGCTAGCTCCATGAGCAATGAGCAGCTGTTCTCAGCCATTGTACGCATGGATGTACCACCTGCACCCTCCAGCTCATTACCAGCAGGCATGCAACAAAGGCAGTCGTCCGTCTCCATTGAACAAGCGAAGTCAGCTTTGAAGGCTGCCAGGGCGTCTGCTGGCAGCAAGACTGCTGGGAAACAAGAACAGGGAAACGACAG…
