# Supplementary material
Source: MDPI journal article supplement (https://www.mdpi.com/1999-4907/14/1/155)
Supplement: s1 [file s1 › Table S3. Primer sequences.xls]

## Sheet: Sheet1
Table S3. The primers used in this study
Gene name	Forward primer (5'-3')	Reverse primer (5'-3')	Annealing temperatures of primers	Product sizes	Use
TUA	CAAACTTGGTCCCGTATCCTC	CACAGAAAGCTGCTCATGGTAA	60℃	95bp	for qRT-PCR analysis
PmbZIP3	CTATGCACATCCTTCCATGCCT	GATCTCTTCATTGTATTCCGCTC	60℃	159bp	for qRT-PCR analysis
PmbZIP4	GAACTTGAGCAGACTGTGGGTTT	CACTGTTTACGGAAGGAGGGGTA	60℃	175bp	for qRT-PCR analysis
PmbZIP8	TGCTCCTCAGAGCATCTCTCTTG	GGTCCTCACACTCAGCCTGTTTAC	60℃	152bp	for qRT-PCR analysis
PmbZIP20	AGAGCCGAAGCAGCTCATCTCA	TCCGTTGTATCAATAAAGCCAGTG	60℃	224bp	for qRT-PCR analysis
PmbZIP23	ACAGGAAGAGAGGGAGAGCCC	TATGATTTTCATTCTGCAAAGTGG	60℃	198bp	for qRT-PCR analysis
PmbZIP3-ORF	ATGGGAACTGGGGAAGAAGC	TTAACCTGTATCAGAACGAGC	60℃	1401bp	for gene cloning
PmbZIP4-ORF	ATGGCGAATAAAATAGATGAACAGG	TTAATCTCTGGGGCGTGCAA	60℃	1422bp	for gene cloning
PmbZIP8-ORF	ATGGGTACAGGAGAGATGGG	CTAACCAGCAGAAACAGACAC	60℃	1398bp	for gene cloning
PmbZIP20-ORF	ATGTCTCCTCCCCCATCATA	CTAATGATAAATTTCTGTTGATGCC	60℃	522bp	for gene cloning
PmbZIP23-ORF	ATGCAGGACACTGCTGCTTC	TTAGGTTTCTGCTCCTGAGT	60℃	489bp	for gene cloning
pBI121-PmbZIP4-GFP	gagaacacgggggactctagaATGGCGAATAAAATAGATGAACAGG	ggactgaccacccggggatccATCTCTGGGGCGTGCAAGC	60℃	1464bp	for subcellular localization vector construction
pBI121-PmbZIP20-GFP	gagaacacgggggactctagaATGTCTCCTCCCCCATCATATTC	ggactgaccacccggggatccATGATAAATTTCTGTTGATGCCAGG	60℃	564bp	for subcellular localization vector construction
PmbZIP3-pGBKT7	atggccatggaggccgaattcATGGGAACTGGGGAAGAAGC	ccgctgcaggtcgacggatccTTAACCTGTATCAGAACGAGCATTC	60℃	1443bp	for transcriptional activation activity vector construction
PmbZIP4-pGBKT7	atggccatggaggccgaattcATGGCGAATAAAATAGATGAACAGG	ccgctgcaggtcgacggatccTTAATCTCTGGGGCGTGCAA	60℃	1464bp	for transcriptional activation activity vector construction
PmbZIP8-pGBKT7	atggccatggaggccgaattcATGGGTACAGGAGAGATGGGG	ccgctgcaggtcgacggatccCTAACCAGCAGAAACAGACACTGC	60℃	1440bp	for transcriptional activation activity vector construction
PmbZIP20-pGBKT7	atggccatggaggccgaattcATGTCTCCTCCCCCATCATATTC	ccgctgcaggtcgacggatccCTAATGATAAATTTCTGTTGATGCCA	60℃	564bp	for transcriptional activation activity vector construction
PmbZIP23-pGBKT7	atggccatggaggccgaattcATGCAGGACACTGCTGCTTCC	ccgctgcaggtcgacggatccTTAGGTTTCTGCTCCTGAGTTACCA	60℃	531bp	for transcriptional activation activity vector construction
Note: The uppercase letters of oligonucleotides from the vector sequence, and the lowercase letters of oligonucleotides from the gene sequence
