# Supplementary material
Source: MDPI journal article supplement (https://www.mdpi.com/1999-4907/14/1/155)
Supplement: s1 [file s1 › Table S4. FPKM values.xls]

## Sheet: Sheet1
Table S4. The FPKM values of PmbZIPs
Gene Name	Gene ID	FPKM Values (0d)	FPKM Values (3d)	FPKM Values (10d)	FPKM Values (20d)	FPKM Values (35d)
PmbZIP1	transcript_HQ_PmMix_transcript5918/f6p0/3002	0.05	0.01	0.045	0.105	0.51
PmbZIP2	transcript_HQ_PmMix_transcript6429/f10p0/2977	11.74	13.535	25.26	12.19	47.935
PmbZIP3	transcript_HQ_PmMix_transcript7678/f19p0/2805	31.64	39.17	27.055	25.95	31.22
PmbZIP4	transcript_HQ_PmMix_transcript7884/f9p0/2803	22.245	21.275	31.86	22.395	29.69
PmbZIP5	transcript_HQ_PmMix_transcript8814/f3p0/2698	21.905	27.245	31.335	28.34	36.665
PmbZIP6	transcript_HQ_PmMix_transcript9580/f3p0/2742	11.875	15.63	8.91	12.065	7.55
PmbZIP7	transcript_HQ_PmMix_transcript10292/f4p0/2624	22.045	26.305	25.125	23.81	28.335
PmbZIP8	transcript_HQ_PmMix_transcript14088/f5p0/2381	5.365	9.675	9.15	5.145	14.99
PmbZIP9	transcript_HQ_PmMix_transcript14618/f2p0/2316	18.83	24.07	19.77	16	21.745
PmbZIP10	transcript_HQ_PmMix_transcript11743/f7p0/2494	44.465	64.15	47.655	43.455	52.885
PmbZIP11	transcript_HQ_PmMix_transcript15869/f2p0/2249	21.995	31.035	27.155	20.195	36.05
PmbZIP12	transcript_HQ_PmMix_transcript16962/f3p0/2187	9.78	9.74	15.605	11.235	15.86
PmbZIP13	transcript_HQ_PmMix_transcript18762/f2p0/2120	2.7	2.155	2.16	2.73	3.87
PmbZIP14	transcript_HQ_PmMix_transcript19444/f2p0/2076	9.945	12.11	9.84	9.425	10.42
PmbZIP15	transcript_HQ_PmMix_transcript18867/f2p0/2078	8.12	10.025	13.16	10.255	11.7
PmbZIP16	transcript_HQ_PmMix_transcript21045/f2p0/1991	4.99	5.095	5.435	5.96	8.65
PmbZIP17	transcript_HQ_PmMix_transcript22849/f5p0/1963	12.81	16.015	11.295	13.49	15.265
PmbZIP18	transcript_HQ_PmMix_transcript22879/f3p0/1943	6.75	7.705	8.155	15.285	8.645
PmbZIP19	transcript_HQ_PmMix_transcript25861/f8p0/1849	24.545	29.67	29.475	27.1	28.335
PmbZIP20	transcript_HQ_PmMix_transcript26658/f4p0/1782	11.985	17.715	6.405	8.615	15.64
PmbZIP21	transcript_HQ_PmMix_transcript3177/f2p0/3431	14.685	18.475	10.405	13.195	9.46
PmbZIP22	transcript_HQ_PmMix_transcript32849/f2p0/1580	34.34	40.4	37.975	42.015	50.72
PmbZIP23	transcript_HQ_PmMix_transcript33510/f4p0/1635	21.275	23.055	67.35	52.96	46.68
PmbZIP24	transcript_HQ_PmMix_transcript39468/f2p0/1317	10.93	15.825	9.67	8.23	12.045
PmbZIP25	transcript_HQ_PmMix_transcript45213/f3p0/1067	22.06	32.745	20.3	16.23	26.44
