# Supplementary material
Source: MDPI journal article supplement (https://www.mdpi.com/1999-4907/14/1/155)
Supplement: s1 [file s1 › Table S5. Physicochemical properties analysis.xls]

## Sheet: Sheet1
Table S5. The characteristics of bZIP TF family members in P. massoniana
Transcription factors	Amino acid number	Isoelectric point	Molecular weight (Da)	Instability index	Aliphatic index	Grand average of hydropathicity
PmbZIP1	475	6.44	51590.2	53.4	62.69	-0.696
PmbZIP2	510	9.45	53804.2	36.5	71.63	-0.514
PmbZIP3	466	5.71	49158.2	56.68	51.63	-0.743
PmbZIP4	473	6.66	51880.1	50.02	74.69	-0.495
PmbZIP5	771	6.15	84073.5	47.55	68.46	-0.627
PmbZIP6	511	7.35	55171.6	60.26	55.62	-0.779
PmbZIP7	364	9.26	40199	57.86	63.52	-0.895
PmbZIP8	465	6.54	49372.5	52.38	50.06	-0.806
PmbZIP9	521	6.16	56280.5	61.66	60.67	-0.723
PmbZIP10	579	5.86	63192.8	56.81	53.28	-1.045
PmbZIP11	496	9.58	52273.4	45.84	67.02	-0.569
PmbZIP12	439	8.76	46650	53.23	59.34	-0.67
PmbZIP13	427	8.56	45341.5	53.31	58.03	-0.676
PmbZIP14	406	5.73	43407.8	53.62	49.61	-0.804
PmbZIP15	364	8.58	40198.2	56.74	73.6	-0.517
PmbZIP16	438	5.3	47523.7	62.19	67.95	-0.587
PmbZIP17	313	9.29	35318.3	58.42	81.76	-0.526
PmbZIP18	202	6.25	22699.2	27.53	55.54	-0.868
PmbZIP19	277	6.36	30014.3	39	55.05	-0.727
PmbZIP20	173	6.3	19425.9	66.98	68.84	-0.649
PmbZIP21	637	6.33	69701.4	67.19	53.3	-0.968
PmbZIP22	329	5.49	36392.7	57.14	81.52	-0.37
PmbZIP23	162	9.94	18119.3	54.49	56.11	-1.173
PmbZIP24	253	5.94	28238.3	61.31	70.63	-0.791
PmbZIP25	163	9.09	18143.1	51.54	62.15	-1.075
PmbZIP26	125	9.52	14391.4	50.7	72.56	-1.063
PmbZIP27	272	5.89	31100.8	39.98	68.42	-0.889
PmbZIP28	163	5.97	18341.3	53.55	70.12	-0.798
PmbZIP29	239	4.9	26769	66.48	64.52	-0.97
PmbZIP30	405	7.67	44732.8	51.65	82.94	-0.279
PmbZIP31	311	5.19	35192	71.49	59.39	-1.004
PmbZIP32	190	8.86	21774.4	63.59	63.68	-0.851
PmbZIP33	278	6.34	30668.3	48.6	70.86	-0.646
PmbZIP34	187	10.15	20433	80.92	58.98	-0.908
PmbZIP35	267	6	30027.5	62.13	70.86	-0.596
PmbZIP36	191	5.38	21895.5	60.72	60.31	-1.236
PmbZIP37	352	11.26	38142.8	70.67	62.78	-0.732
PmbZIP38	158	5.31	18511.8	56.17	72.34	-0.93
PmbZIP39	419	5.39	45432.9	67.72	63.94	-0.738
PmbZIP40	470	5.75	52188.8	67.04	60.4	-0.85
PmbZIP41	135	8.79	15389.2	57.6	61.48	-1.092
PmbZIP42	363	6.23	40463.5	59.46	72.42	-0.591
PmbZIP43	230	9.27	25542.1	73.56	75.26	-0.622
PmbZIP44	497	6.9	55415.3	67.38	70.18	-0.572
PmbZIP45	182	6.52	20744	70.66	64.89	-0.895
PmbZIP46	236	6.71	26628.7	58.06	71.19	-0.719
PmbZIP47	355	5.47	40095.6	54.67	67.89	-0.768
PmbZIP48	259	4.88	28139.2	40.12	66.1	-0.531
PmbZIP49	297	5.48	31557.3	58.61	66.53	-0.446
PmbZIP50	210	6.43	24050.8	69.03	67.43	-0.84
PmbZIP51	265	6.31	30058.5	69.65	76.23	-0.678
PmbZIP52	90	9.39	10698.3	88.65	73.67	-1.067
PmbZIP53	104	8.95	12218.9	43.54	63.75	-1.062
PmbZIP54	156	7.92	16821.3	52.77	49.49	-0.942
PmbZIP55	254	9.33	27474.2	57.04	67.01	-0.786
