# Supplementary material
Source: MDPI journal article supplement (https://www.mdpi.com/1999-4907/14/1/155)
Supplement: s1 [file s1 › Table S6. Subcellular localization prediction.xls]

## Sheet: Sheet1
Table S6. Subcellular localization prediction of PmbZIP TFs of P. massoniana
Transcription factors	Subcellular localization
PmbZIP1	Nuclear
PmbZIP2	Nuclear
PmbZIP3	Nuclear
PmbZIP4	Nuclear
PmbZIP5	Nuclear
PmbZIP6	Nuclear
PmbZIP7	Nuclear
PmbZIP8	Nuclear
PmbZIP9	Nuclear
PmbZIP10	Nuclear
PmbZIP11	Nuclear
PmbZIP12	Nuclear
PmbZIP13	Nuclear
PmbZIP14	Nuclear
PmbZIP15	Nuclear
PmbZIP16	Nuclear
PmbZIP17	Nuclear
PmbZIP18	Nuclear
PmbZIP19	Nuclear
PmbZIP20	Nuclear
PmbZIP21	Nuclear
PmbZIP22	Nuclear
PmbZIP23	Nuclear
PmbZIP24	Nuclear
PmbZIP25	Nuclear
PmbZIP26	Nuclear
PmbZIP27	Nuclear
PmbZIP28	Nuclear
PmbZIP29	Nuclear
PmbZIP30	Nuclear
PmbZIP31	Nuclear
PmbZIP32	Nuclear
PmbZIP33	Nuclear
PmbZIP34	Nuclear
PmbZIP35	Nuclear
PmbZIP36	Nuclear
PmbZIP37	Nuclear
PmbZIP38	Nuclear
PmbZIP39	Nuclear
PmbZIP40	Nuclear
PmbZIP41	Nuclear
PmbZIP42	Nuclear
PmbZIP43	Nuclear
PmbZIP44	Nuclear
PmbZIP45	Nuclear
PmbZIP46	Nuclear
PmbZIP47	Nuclear
PmbZIP48	Nuclear
PmbZIP49	Nuclear
PmbZIP50	Nuclear
PmbZIP51	Nuclear
PmbZIP52	Nuclear
PmbZIP53	Nuclear
PmbZIP54	Nuclear
PmbZIP55	Nuclear
